# Supplementary material for: Applying DNA barcoding to conservation practice: a case study of endangered birds and large mammals in China
Source: Springer Nature journal article supplement (doi:10.1007/s10531-016-1263-y), 2016-12-05
Supplement: 10531_2016_1263_MOESM1_ESM.pdf [file 10531_2016_1263_MOESM1_ESM.pdf]

Applying DNA barcoding to conservation practice: a case study of endangered birds and large mammals in China

*Biodiversity and Conservation*

Jing Li, Yaoyao Cui, Juan Jiang, Jianqiu Yu, Lili Niu, Jiabo Deng, Fujun Shen, Liang Zhang, Bisong Yue\*, Jing Li\*

College of Life Sciences, Sichuan University

\*Corresponding author: ljtjf@126.com; bsyue@scu.edu.cn

Table 1 Collection information of the investigated samples, (a) birds, (b) mammals. The underlined samples failed to retrieve COI sequences and were discarded in the molecular identification. Class I and Class II referred to first-grade and second-grade state protection animals, respectively

(a)

| Putative species                 | Taxonomy      |             | Sample vouchers                   | Tissue            | Location/Source                                             | Collection date                    | No. of whole specimens | Remarks                                        |
|----------------------------------|---------------|-------------|-----------------------------------|-------------------|-------------------------------------------------------------|------------------------------------|------------------------|------------------------------------------------|
|                                  | Order         | Family      |                                   |                   |                                                             |                                    |                        |                                                |
| <i>Lophophorus lhuysii</i>       | Galliformes   | Phasianidae | B04                               | muscle            | Sichuan, Pixian                                             | 2007-9-28                          | 1                      | Class I, endemic to China<br>IUCN: Vulnerable  |
| <i>Chrysolophus pictus</i>       | Galliformes   | Phasianidae | <u>B26</u>                        | feather           | Shaanxi, Hanzhong, Yuhuang Mountain                         | 2012-3-4                           | 1                      | Class II<br>IUCN: Least Concern                |
| <i>Phasianus colchicus</i>       | Galliformes   | Phasianidae | B12, B35, <u>B36</u>              | feather<br>muscle | Tibet;<br>Sichuan, Baoxing                                  | 2008-2-25<br>2007-12-12            | 3                      | IUCN: Least Concern                            |
| <i>Arborophila rufipectus</i>    | Galliformes   | Phasianidae | AR1, AR2, AR3,<br>AR5, ARB3, ARB6 | blood             | Sichuan, Pingshan,<br>Laojunshan National<br>Nature Reserve | 2008-5-2<br>2012-4-28<br>2012-5-24 | 2                      | Class I, endemic to China<br>IUCN: Endangered  |
| <i>Arborophila ardens</i>        | Galliformes   | Phasianidae | B10, <u>B11</u>                   | muscle†           | Hainan                                                      | 2009-3-25                          | 1                      | Class I, endemic to China,<br>IUCN: Vulnerable |
| <i>Arborophila brunneopectus</i> | Galliformes   | Phasianidae | B33                               | muscle            | Yunnan, Sipsongpanna                                        | 2012-1-14                          | 1                      | IUCN: Least Concern                            |
| <i>Pandion haliaetus</i>         | Falconiformes | Pandionidae | B02                               | muscle†           | Sichuan, Pixian                                             | 2009-9-26                          | 0                      | Class II                                       |

|                               |               |              |                            |         |                  |            |   |                                           |
|-------------------------------|---------------|--------------|----------------------------|---------|------------------|------------|---|-------------------------------------------|
| <i>Accipiter virgatus</i>     | Falconiformes | Accipitridae | B03                        | feather | Chengdu*         | 2006-1-8   | 0 | IUCN: Least Concern<br>Class II           |
| <i>Aquila clanga</i>          | Falconiformes | Accipitridae | B16                        | muscle† | Sichuan, Aba     | 2005-10-12 | 0 | IUCN: Least Concern<br>Class II           |
| <i>Falco cherrug</i>          | Falconiformes | Falconidae   | B05                        | muscle† | Sichuan, Ganzi   | 2010-10-26 | 0 | IUCN: Vulnerable<br>Class II              |
| <i>Falco tinnunculus</i>      | Falconiformes | Falconidae   | B13                        | muscle  | Sichuan, Chengdu | 2008-10-21 | 1 | IUCN: Endangered<br>Class II              |
| <i>Asio otus</i>              | Strigiformes  | Strigidae    | B08                        | muscle† | Sichuan, Pixian  | 2011-9-26  | 0 | IUCN: Least Concern<br>Class II           |
| <i>Athene noctus</i>          | Strigiformes  | Strigidae    | B15                        | muscle  | Gansu, Baiyin    | 2008-1-1   | 1 | IUCN: Least Concern<br>Class II           |
| <i>Grus monacha</i>           | Gruiformes    | Gruidae      | N1, N2, N25                | blood   | CRBGPB*          | 2011-12-12 | 3 | IUCN: Vulnerable<br>Class I               |
| <i>Grus vipio</i>             | Gruiformes    | Gruidae      | N15, N16                   | blood   | CRBGPB*          | 2011-12-12 | 2 | IUCN: Vulnerable<br>Class II              |
| <i>Grus nigricollis</i>       | Gruiformes    | Gruidae      | N17, N23, N24              | blood   | CRBGPB*          | 2011-12-12 | 3 | IUCN: Vulnerable<br>Class I               |
| <i>Grus leucogeranus</i>      | Gruiformes    | Gruidae      | N18, N19, N29,<br>N30      | blood   | CRBGPB*          | 2011-12-13 | 4 | IUCN: Critically<br>Endangered<br>Class I |
| <i>Grus japonensis</i>        | Gruiformes    | Gruidae      | N20, N21, N22,<br>N33, N34 | blood   | CRBGPB*          | 2011-12-13 | 5 | IUCN: Endangered<br>Class I               |
| <i>Anthropoides virgo</i>     | Gruiformes    | Gruidae      | N27, N28                   | blood   | CRBGPB*          | 2011-12-13 | 2 | IUCN: Least Concern<br>Class II           |
| <i>Ciconia ciconia</i>        | Ciconiiformes | Ciconiidae   | N7, N8, N31, N32           | blood   | CRBGPB*          | 2011-12-14 | 3 | IUCN: Least Concern<br>Class I            |
| <i>Leptoptilos crumenifer</i> | Ciconiiformes | Ciconiidae   | N9, N10, N11               | blood   | CRBGPB*          | 2011-12-14 | 2 | IUCN: Least Concern<br>Class I            |
| <i>Mycteria ibis</i>          | Ciconiiformes | Ciconiidae   | N12, N13, N14              | blood   | CRBGPB*          | 2011-12-15 | 3 | IUCN: Least Concern<br>Class I            |

(b)

| Scientific name                 | Taxonomy     |                 | Sample vouchers | Tissue           | Location/Source            | Collection date         | No. of whole specimens | Remarks                                       |
|---------------------------------|--------------|-----------------|-----------------|------------------|----------------------------|-------------------------|------------------------|-----------------------------------------------|
|                                 | Order        | Family          |                 |                  |                            |                         |                        |                                               |
| <i>Pseudois nayaur</i>          | Artiodactyla | Bovidae         | A11             | heart            | Ningxia, Yinchuan          | 2006-10-10              | 1                      | Class II<br>IUCN: Least Concern               |
| <i>Pseudois schaeferi</i>       | Artiodactyla | Bovidae         | A17             | muscle           | Sichuan, Batang            | 2006-4-5                | 1                      | Class II, endemic to China                    |
| <i>Pantholops hodgsonii</i>     | Artiodactyla | Bovidae         | A53             | muscle           | Tibet                      | 2008-2-25               | 0                      | Class I, endemic to China<br>IUCN: Endangered |
| <i>Cervus unicolor</i>          | Artiodactyla | Cervidae        | A23             | fur              | Sichuan, Baoxing           | Unknown                 | 0                      | Class II<br>IUCN: Vulnerable                  |
| <i>Cervus albirostris</i>       | Artiodactyla | Cervidae        | A29             | fur              | Sichuan, Aba,              | Unknown                 | 0                      | Class I<br>IUCN: Vulnerable                   |
| <i>Cervus nippon</i>            | Artiodactyla | Cervidae        | M1, Q2, H26     | fur              | Sichuan, Aba,<br>Ruoergai  | 2007-8-1                | 0                      | Class I<br>IUCN: Least Concern                |
| <i>Mandrillus sphinx</i>        | Primates     | Cercopithecidae | S38, S62        | kidney†<br>blood | Qingdao Zoo<br>Chengdu Zoo | 1998-1-12<br>2010-6-3   | 2                      | IUCN: Vulnerable                              |
| <i>Cercopithecus mitis</i>      | Primates     | Cercopithecidae | S30,S36         | liver†           | CRBGPB*                    | 1996-1-23               | 2                      | IUCN: Least Concern                           |
| <i>Chlorocebus aethiops</i>     | Primates     | Cercopithecidae | S64             | blood            | Chengdu Zoo                | Unknown                 | 1                      | IUCN: Least Concern                           |
| <i>Trachypithecus francoisi</i> | Primates     | Cercopithecidae | S44, S63        | muscle<br>blood  | CRBGPB*<br>Chengdu Zoo     | 2008-12-1<br>2010-12-21 | 1                      | Class I<br>IUCN: Endangered                   |
| <i>Papio sp.</i>                | Primates     | Cercopithecidae | S29<br>S61      | liver†<br>blood  | CRBGPB*<br>Chengdu Zoo     | 1995-12-29<br>2002-3-20 | 0                      |                                               |
| <i>Saimiri sciureus</i>         | Primates     | Cebidae         | S45,S50         | muscle           | CRBGPB*                    | 2008-12-1               | 2                      | IUCN: Least Concern                           |

|                                  |           |           |                                   |                |                   |                         |   |                                                |
|----------------------------------|-----------|-----------|-----------------------------------|----------------|-------------------|-------------------------|---|------------------------------------------------|
| <i>Cebus apella</i>              | Primates  | Cebidae   | S46                               | muscle         | CRBGPB*           | 2008-12-1               | 1 | IUCN: Least Concern                            |
| <i>Nycticebus coucang</i>        | Primates  | Lorisidae | S49                               | fur            | CRBGPB*           | 2008-12-1               | 0 | Class I<br>IUCN: Vulnerable                    |
| <i>Lemur catta</i>               | Primates  | Lemurida  | S26                               | heart          | CRBGPB*           | 1995-1-24               | 1 | IUCN: Endangered                               |
| <i>Panthera leo</i>              | Carnivora | Felidae   | S14, S15, S18                     | blood          | CRBGPB            | Unknown                 | 3 | IUCN: Vulnerable                               |
| <i>Panthera pardus</i>           | Carnivora | Felidae   | S23,S28                           | liver<br>blood | CRBGPB*           | 1994-9-22<br>1995-12-24 | 2 | Class I<br>IUCN: Near Threatened               |
| <i>Panthera tigris amoyensis</i> | Carnivora | Felidae   | S53,S54,S55,S56,S57,<br>S58, S59  | blood          | CRBGPB*           | Unknown                 | 7 | Class I<br>IUCN: Endangered                    |
| <i>Felis bieti</i>               | Carnivora | Felidae   | <u>S7</u> , <u>S8</u> , <u>S9</u> | blood†         | CRBGPB*           | Unknown                 | 1 | Class II, endemic to China<br>IUCN: Vulnerable |
| <i>Neofelis nebulosa</i>         | Carnivora | Felidae   | <u>S19</u> , <u>S20</u>           | blood†         | CRBGPB*           | Unknown                 | 0 | Class I<br>IUCN: Vulnerable                    |
| <i>Cuon alpinus</i>              | Carnivora | Canidae   | S51                               | fur            | Sichuan, Kangding | 1997-2                  | 0 | Class II<br>IUCN: Endangered                   |
| <i>Ailuropoda melanoleuca</i>    | Carnivora | Ailuridae | A3, A4, XJ, A144                  | blood<br>feces | CRBGPB            | 2009-11-3               | 4 | Class I<br>IUCN: Endangered                    |

\* showed the source of samples rather than the locations. CRBGPB is an abbreviation of Chengdu Research Base of Giant Panda Breeding.

† represented tissues with different degree of decay.

Table 2 PCR primers used in this study

| Primers | Primer sequence (5'-3')      | Direction | Primer source       |
|---------|------------------------------|-----------|---------------------|
| BirdF1  | TTCTCCAACCACAAAGACATTGGCAC   | F         | Kerr et al. 2007    |
| BirdR1  | ACGTGGGAGATAATTCCAAATCCTG    | R         | Kerr et al. 2007    |
| FalcoFa | TCAACAAACCACAAAGACATCGGCAC   | F         | Kerr et al. 2007    |
| BirdR2  | ACTACATGTGAGATGATTCCGAATCCAG | R         | Kerr et al. 2007    |
| GF_1    | TCAACYAACCACAAAGATATCGGAAC   | F         | Originally designed |
| GR_1    | ACGTGTGAGATGATTCCAAAACCTG    | R         | Originally designed |
| VF1     | TTCTCAACCAACCACAAAGACATTGG   | F         | Ward et al. 2005    |
| VR1     | TAGACTTCTGGGTGGCCAAAGAATCA   | R         | Ward et al. 2005    |
| VF1d    | TTCTCAACCAACCACAARGAYATYGG   | F         | Ivanova et al. 2006 |
| VR1d    | TAGACTTCTGGGTGGCCRAARAAYCA   | R         | Ivanova et al. 2006 |

Table 3 Downloaded barcodes of (a) birds, (b) mammals used in the study

(a)

| Species                         | Order         | Family     | Sample No. | GenBank accessions                               |
|---------------------------------|---------------|------------|------------|--------------------------------------------------|
| <i>Grus monacha</i>             | Gruiformes    | Gruidae    | 2          | NC020578, EF515778                               |
| <i>Grus nigricollis</i>         | Gruiformes    | Gruidae    | 1          | NC020579                                         |
| <i>Grus grus</i>                | Gruiformes    | Gruidae    | 4          | GU571424, GU571425, GU571916, NC020577           |
| <i>Grus japonensis</i>          | Gruiformes    | Gruidae    | 1          | NC020575                                         |
| <i>Grus canadensis</i>          | Gruiformes    | Gruidae    | 2          | NC020582, JQ174965                               |
| <i>Grus antigone</i>            | Gruiformes    | Gruidae    | 1          | NC020581                                         |
| <i>Grus vipio</i>               | Gruiformes    | Gruidae    | 2          | NC021368, KF939579                               |
| <i>Grus leucogeranus</i>        | Gruiformes    | Gruidae    | 3          | NC020574, KF958462, KF939578                     |
| <i>Anthropoides virgo</i>       | Gruiformes    | Gruidae    | 2          | NC020573, JQ174043                               |
| <i>Mycteria leucocephala</i>    | Ciconiiformes | Ciconiidae | 2          | HM804932, HM804933                               |
| <i>Mycteria americana</i>       | Ciconiiformes | Ciconiidae | 3          | FJ027865, DQ433030, JQ175426                     |
| <i>Ciconia nigra</i>            | Ciconiiformes | Ciconiidae | 1          | AY567882                                         |
| <i>Ciconia ciconia</i>          | Ciconiiformes | Ciconiidae | 4          | GU571816, GU571817, NC002197, AY567881           |
| <i>Ciconia boyciana</i>         | Ciconiiformes | Ciconiidae | 1          | NC002196                                         |
| <i>Microhierax caerulescens</i> | Falconiformes | Falconidae | 1          | JQ175370                                         |
| <i>Falco tinnunculus</i>        | Falconiformes | Falconidae | 5          | GQ481882, GQ481883, GU571393, GU571886, NC011307 |
| <i>Falco rusticolus</i>         | Falconiformes | Falconidae | 4          | GU571882, KF525372, GU571390, DQ432927           |
| <i>Falco peregrinus</i>         | Falconiformes | Falconidae | 4          | JX029991, JQ282801, GU571880,                    |

---

|                              |               |              |   |                                                               |
|------------------------------|---------------|--------------|---|---------------------------------------------------------------|
|                              |               |              |   | GU571388                                                      |
| <i>Falco columbarius</i>     | Falconiformes | Falconidae   | 3 | GU571878, GU571384, KF537263                                  |
| <i>Falco amurensis</i>       | Falconiformes | Falconidae   | 2 | GQ481872, GQ481873                                            |
| <i>Falco vespertinus</i>     | Falconiformes | Falconidae   | 1 | JQ174839                                                      |
| <i>Falco naumanni</i>        | Falconiformes | Falconidae   | 3 | GU571386, GQ481875, GQ481876                                  |
| <i>Falco subbuteo</i>        | Falconiformes | Falconidae   | 5 | GU571392, GU571884, GQ481877,<br>GQ481878, GQ481880           |
| <i>Pandion haliaetus</i>     | Falconiformes | Pandionidae  | 5 | DQ434696, DQ433863, GU571998,<br>GU571516, NC008550           |
| <i>Accipiter gentilis</i>    | Falconiformes | Accipitridae | 6 | GQ922623, GQ922625, NC011818,<br>GU571207, AY666498, DQ433279 |
| <i>Accipiter nisus</i>       | Falconiformes | Accipitridae | 4 | GU571210, JF312191, JF312194,<br>GQ922642                     |
| <i>Accipiter soloensis</i>   | Falconiformes | Accipitridae | 3 | JF312282, JF312184, JF312185                                  |
| <i>Accipiter gularis</i>     | Falconiformes | Accipitridae | 3 | JF792341, JF792343, JQ173889                                  |
| <i>Accipiter virgatus</i>    | Falconiformes | Accipitridae | 3 | GQ481352, GQ481253, JF312186                                  |
| <i>Buteo buteo</i>           | Falconiformes | Accipitridae | 5 | GQ922641, GQ481407, NC003128,<br>GU571289, GU571769           |
| <i>Buteo hemilasius</i>      | Falconiformes | Accipitridae | 2 | GQ922627, GQ922628                                            |
| <i>Buteo lagopus</i>         | Falconiformes | Accipitridae | 3 | AY666502, GU571771, GU571292                                  |
| <i>Aquila clanga</i>         | Falconiformes | Accipitridae | 1 | GU571739                                                      |
| <i>Aquila chrysaetos</i>     | Falconiformes | Accipitridae | 3 | GU571264, GU571265, GU571737                                  |
| <i>Haliaeetus indus</i>      | Falconiformes | Accipitridae | 1 | HM639875                                                      |
| <i>Otus sunia</i>            | Strigiformes  | Strigidae    | 3 | GQ482286, GQ482287, GQ482289                                  |
| <i>Otus scops</i>            | Strigiformes  | Strigidae    | 1 | JQ175647                                                      |
| <i>Ninox scutulata</i>       | Strigiformes  | Strigidae    | 1 | EU251422                                                      |
| <i>Aegolius funereus</i>     | Strigiformes  | Strigidae    | 3 | GU571226, GQ482195, GU571703                                  |
| <i>Glaucidium cuculoides</i> | Strigiformes  | Strigidae    | 2 | JQ174938, JQ174939                                            |
| <i>Glaucidium passerinum</i> | Strigiformes  | Strigidae    | 2 | GU571423, GU571915                                            |
| <i>Bubo bubo</i>             | Strigiformes  | Strigidae    | 3 | GU571764, GU571285, GQ922629                                  |
| <i>Bubo scandiacus</i>       | Strigiformes  | Strigidae    | 4 | GU571287, EU525330, EU525331,<br>EU525332                     |
| <i>Strix nebulosa</i>        | Strigiformes  | Strigidae    | 4 | KF525370, DQ434173, GU572107,<br>GU572108                     |
| <i>Strix leptogrammica</i>   | Strigiformes  | Strigidae    | 1 | NC021970                                                      |
| <i>Strix aluco</i>           | Strigiformes  | Strigidae    | 3 | GU571634, GU572104, GU572106                                  |
| <i>Strix uralensis</i>       | Strigiformes  | Strigidae    | 5 | GQ482681, GQ482682, GU571637,<br>GU572109, GU572110           |
| <i>Strix davidi</i>          | Strigiformes  | Strigidae    | 1 | GQ922637                                                      |
| <i>Ithaginis cruentus</i>    | Galliformes   | Phasianidae  | 2 | GQ922649, NC018033                                            |
| <i>Arborophila</i>           | Galliformes   | Phasianidae  | 3 | NC012453, GQ922643, GQ922644                                  |

---

---

|                                  |             |             |   |                                        |  |
|----------------------------------|-------------|-------------|---|----------------------------------------|--|
| <i>rufipectus</i>                |             |             |   |                                        |  |
| <i>Arborophila ardens</i>        | Galliformes | Phasianidae | 1 | NC022683                               |  |
| <i>Arborophila brunneopectus</i> | Galliformes | Phasianidae | 1 | NC022684                               |  |
| <i>Arborophila rufogularis</i>   | Galliformes | Phasianidae | 1 | NC020584                               |  |
| <i>Arborophila gingica</i>       | Galliformes | Phasianidae | 1 | FJ752425                               |  |
| <i>Tetraogallus altaicus</i>     | Galliformes | Phasianidae | 1 | GQ482760                               |  |
| <i>Francolinus pintadeanus</i>   | Galliformes | Phasianidae | 1 | NC011817                               |  |
| <i>Francolinus francolinus</i>   | Galliformes | Phasianidae | 2 | JF498852, JF498851                     |  |
| <i>Francolinus pondicerianus</i> | Galliformes | Phasianidae | 3 | JF498853, JF498854, JF498855           |  |
| <i>Francolinus erckelii</i>      | Galliformes | Phasianidae | 2 | JF498849, JF498850                     |  |
| <i>Gallus gallus</i>             | Galliformes | Phasianidae | 3 | AP003580, KC189864, KC189866           |  |
| <i>Tetraophasis obscurus</i>     | Galliformes | Phasianidae | 1 | NC018034                               |  |
| <i>Tetraophasis szechenyii</i>   | Galliformes | Phasianidae | 4 | NC020613, GQ922645, GQ922646, GQ922647 |  |
| <i>Lophophorus sclateri</i>      | Galliformes | Phasianidae | 1 | NC020589                               |  |
| <i>Lophophorus lhuysii</i>       | Galliformes | Phasianidae | 1 | NC013979                               |  |
| <i>Tragopan temminckii</i>       | Galliformes | Phasianidae | 4 | NC020586, GQ922633, GQ922634, GQ922635 |  |
| <i>Tragopan caboti</i>           | Galliformes | Phasianidae | 1 | NC013619                               |  |
| <i>Pucrasia macrolopha</i>       | Galliformes | Phasianidae | 2 | NC020587, GQ922648                     |  |
| <i>Syrmaticus ellioti</i>        | Galliformes | Phasianidae | 1 | NC010771                               |  |
| <i>Syrmaticus humiae</i>         | Galliformes | Phasianidae | 1 | NC010774                               |  |
| <i>Syrmaticus reevesii</i>       | Galliformes | Phasianidae | 1 | NC010770                               |  |
| <i>Phasianus colchicus</i>       | Galliformes | Phasianidae | 4 | NC015526, JN850750, GQ482363, GQ922650 |  |
| <i>Phasianus versicolor</i>      | Galliformes | Phasianidae | 1 | NC010778                               |  |
| <i>Chrysolophus pictus</i>       | Galliformes | Phasianidae | 3 | NC014576, GQ922630, FJ752433           |  |
| <i>Chrysolophus amherstiae</i>   | Galliformes | Phasianidae | 4 | GQ922603, GQ922604, GQ922608, FJ752434 |  |
| <i>Lophura nycthemera</i>        | Galliformes | Phasianidae | 3 | NC012895, GQ922618, GQ922620           |  |
| <i>Lophura swinhoii</i>          | Galliformes | Phasianidae | 1 | KF218954                               |  |
| <i>Crossoptilon auritum</i>      | Galliformes | Phasianidae | 3 | GQ922639, GQ922640, NC015897           |  |
| <i>Crossoptilon crossoptilon</i> | Galliformes | Phasianidae | 3 | NC016679, GQ922613, GQ922614           |  |

---

(b)

| Species                         | Order        | Family                 | Sample No. | GenBank accessions                                                   |
|---------------------------------|--------------|------------------------|------------|----------------------------------------------------------------------|
| <i>Cervus nippon</i>            | Artiodactyla | Cervidae (Cervinae)    | 7          | EU835712, EU835714, GQ329010, JF700150, JF700148, NC013834, AB116261 |
| <i>Cervus albirostris</i>       | Artiodactyla | Cervidae (Cervinae)    | 4          | NC016707, GQ329003, GQ329005, JN632690                               |
| <i>Cervus unicolor</i>          | Artiodactyla | Cervidae (Cervinae)    | 5          | GQ411197, KF317912, GQ329017, GQ329016, JN714175                     |
| <i>Cervus elaphus</i>           | Artiodactyla | Cervidae (Cervinae)    | 5          | NC014703, NC013836, KF317906, KF317914, NC007704                     |
| <i>Elaphurus davidianus</i>     | Artiodactyla | Cervidae (Cervinae)    | 5          | GQ329018, GQ329019, GQ329025, GQ329026, NC018358                     |
| <i>Muntiacus muntjak</i>        | Artiodactyla | Cervidae (Muntiacinae) | 2          | NC004563, JN714193                                                   |
| <i>Muntiacus crinifrons</i>     | Artiodactyla | Cervidae (Muntiacinae) | 4          | GQ329035, GQ329036, GQ329037, NC004577                               |
| <i>Muntiacus reevesi</i>        | Artiodactyla | Cervidae (Muntiacinae) | 2          | NC004069, NC008491                                                   |
| <i>Elaphodus cephalophus</i>    | Artiodactyla | Cervidae (Muntiacinae) | 1          | NC008749                                                             |
| <i>Pseudois nayaur</i>          | Artiodactyla | Bovidae (Caprinae)     | 4          | HQ269457, HQ269458, HQ269459, NC020632                               |
| <i>Pseudois schaeferi</i>       | Artiodactyla | Bovidae (Caprinae)     | 4          | HQ269424, HQ269423, JX120620, NC016689                               |
| <i>Pantholops hodgsonii</i>     | Artiodactyla | Bovidae (Caprinae)     | 3          | HQ269460, HQ269461, NC007441                                         |
| <i>Naemorhedus caudatus</i>     | Artiodactyla | Bovidae (Caprinae)     | 1          | NC013751                                                             |
| <i>Naemorhedus goral</i>        | Artiodactyla | Bovidae (Caprinae)     | 4          | HQ269425, HQ269426, HQ269427, NC021381                               |
| <i>Naemorhedus baileyi</i>      | Artiodactyla | Bovidae (Caprinae)     | 1          | NC020722                                                             |
| <i>Capricornis sumatraensis</i> | Artiodactyla | Bovidae (Caprinae)     | 3          | NC020629, HQ269431, HQ269456                                         |
| <i>Capricornis swinhoei</i>     | Artiodactyla | Bovidae (Caprinae)     | 1          | NC010640                                                             |
| <i>Ovis ammon</i>               | Artiodactyla | Bovidae (Caprinae)     | 1          | NC020656                                                             |



|                                  |          |                                   |   |                                                  |
|----------------------------------|----------|-----------------------------------|---|--------------------------------------------------|
| <i>Lemur catta</i>               | Primates | Lemuridae                         | 1 | NC004025                                         |
| <i>Eulemur macaco</i>            | Primates | Lemuridae                         | 1 | JF444301                                         |
| <i>Nycticebus coucang</i>        | Primates | Lorisidae                         | 2 | GQ259900, NC002765                               |
| <i>Nycticebus pygmaeus</i>       | Primates | Lorisidae                         | 1 | GQ259902                                         |
| <i>Saimiri sciureus</i>          | Primates | Cebidae (Saimiriinae)             | 4 | JF459275, AF312705, HQ005491, NC012775           |
| <i>Saimiri ustus</i>             | Primates | Cebidae (Saimiriinae)             | 1 | AF312704                                         |
| <i>Saimiri boliviensis</i>       | Primates | Cebidae (Saimiriinae)             | 2 | NC018096, NC021966                               |
| <i>Cebus xanthosternos</i>       | Primates | Cebidae (Cebinae)                 | 1 | NC021961                                         |
| <i>Cebus apella</i>              | Primates | Cebidae (Cebinae)                 | 5 | NC016666, JF459118, FJ402879, FJ402870, FJ392287 |
| <i>Cebus albifrons</i>           | Primates | Cebidae (Cebinae)                 | 1 | NC002763                                         |
| <i>Papio papio</i>               | Primates | Cercopithecidae (Cercopithecinae) | 2 | NC020009, AY972684                               |
| <i>Papio hamadryas</i>           | Primates | Cercopithecidae (Cercopithecinae) | 2 | NC001992, Y18001                                 |
| <i>Papio anubis</i>              | Primates | Cercopithecidae (Cercopithecinae) | 4 | FJ713433, KC757406, JX946197, NC020006           |
| <i>Papio ursinus</i>             | Primates | Cercopithecidae (Cercopithecinae) | 1 | NC020010                                         |
| <i>Mandrillus sphinx</i>         | Primates | Cercopithecidae (Cercopithecinae) | 1 | NC021956                                         |
| <i>Cercopithecus kandii</i>      | Primates | Cercopithecidae (Cercopithecinae) | 1 | JQ256968                                         |
| <i>Cercopithecus albogularis</i> | Primates | Cercopithecidae (Cercopithecinae) | 1 | NC021944                                         |
| <i>Cercopithecus mitis</i>       | Primates | Cercopithecidae (Cercopithecinae) | 2 | NC023961, AY972790                               |
| <i>Chlorocebus aethiops</i>      | Primates | Cercopithecidae (Cercopithecinae) | 4 | NC007009, AY972651, AY972687, DQ069713           |
| <i>Chlorocebus tantalus</i>      | Primates | Cercopithecidae (Cercopithecinae) | 1 | NC009748                                         |
| <i>Chlorocebus pygerythrus</i>   | Primates | Cercopithecidae (Cercopithecinae) | 1 | NC009747                                         |
| <i>Chlorocebus sabaeus</i>       | Primates | Cercopithecidae (Cercopithecinae) | 1 | NC008066                                         |
| <i>Macaca sylvanus</i>           | Primates | Cercopithecidae (Cercopithecinae) | 3 | JF444309, NC002764, JF444310                     |
| <i>Macaca nemestrina</i>         | Primates | Cercopithecidae (Cercopithecinae) | 1 | EF568609                                         |
| <i>Macaca mulatta</i>            | Primates | Cercopithecidae (Cercopithecinae) | 3 | EF568612, EF568611, NC005943                     |
| <i>Macaca fuscata</i>            | Primates | Cercopithecidae (Cercopithecinae) | 1 | JF444308                                         |

|                                   |           |                                   |   |                                                            |
|-----------------------------------|-----------|-----------------------------------|---|------------------------------------------------------------|
| <i>Macaca fascicularis</i>        | Primates  | Cercopithecidae (Cercopithecinae) | 2 | NC012670, KF305937                                         |
| <i>Macaca thibetana</i>           | Primates  | Cercopithecidae (Cercopithecinae) | 1 | NC011519                                                   |
| <i>Macaca assamensis</i>          | Primates  | Cercopithecidae (Cercopithecinae) | 1 | NC023795                                                   |
| <i>Trachypithecus francoisi</i>   | Primates  | Cercopithecidae (Colobinae)       | 1 | NC023970                                                   |
| <i>Trachypithecus hatinhensis</i> | Primates  | Cercopithecidae (Colobinae)       | 1 | NC019579                                                   |
| <i>Rhinopithecus roxellana</i>    | Primates  | Cercopithecidae (Colobinae)       | 1 | NC008218                                                   |
| <i>Rhinopithecus bieti</i>        | Primates  | Cercopithecidae (Colobinae)       | 2 | NC015486, HQ287798                                         |
| <i>Rhinopithecus brelichi</i>     | Primates  | Cercopithecidae (Colobinae)       | 2 | NC018057, JN540032                                         |
| <i>Rhinopithecus avunculus</i>    | Primates  | Cercopithecidae (Colobinae)       | 2 | NC015485, JF293093                                         |
| <i>Ursus arctos</i>               | Carnivora | Ursidae (Ursinae)                 | 5 | JF443542, JF443544, GQ901981, GQ901983, JF499381           |
| <i>Ursus thibetanus</i>           | Carnivora | Ursidae (Ursinae)                 | 3 | NC009971, JF681229, JF681227                               |
| <i>Ursus maritimus</i>            | Carnivora | Ursidae (Ursinae)                 | 5 | JX196375, JX196389, JF499382, JF443549, NC003428           |
| <i>Tremarctos ornatus</i>         | Carnivora | Ursidae (Ursinae)                 | 2 | FM177764, NC009969                                         |
| <i>Ailuropoda melanoleuca</i>     | Carnivora | Ursidae (Ailuropodinae)           | 1 | NC009492                                                   |
| <i>Panthera leo</i>               | Carnivora | Felidae (Pantherinae)             | 2 | JF444382, KF776494                                         |
| <i>Panthera pardus</i>            | Carnivora | Felidae (Pantherinae)             | 2 | JF444283, NC010641                                         |
| <i>Panthera onca</i>              | Carnivora | Felidae (Pantherinae)             | 1 | NC022842                                                   |
| <i>Panthera tigris</i>            | Carnivora | Felidae (Pantherinae)             | 6 | FJ455123, FJ461530, NC010642, KF297576, FJ461531, NC014770 |
| <i>Uncia uncia</i>                | Carnivora | Felidae (Pantherinae)             | 2 | NC010638, JF444483                                         |

Table 4 Ambiguous identifications in the online nucleotide BLAST for (a) birds, (b) mammals

(a)

| Sample vouchers      | Outputs of online nucleotide BLAST |           |                 |              |
|----------------------|------------------------------------|-----------|-----------------|--------------|
|                      | Classified species                 | Max score | Query cover (%) | Identity (%) |
| <b>B03*</b>          | <i>Accipiter gularis</i>           | 1197      | 100             | 100          |
|                      | <i>Accipiter virgatus</i>          | 1197      | 100             | 100          |
| <b>N9*,N10*,N11*</b> | <i>Ciconia maguari</i>             | 854-856   | 99-100          | 90-91        |

|               |                         |           |     |    |
|---------------|-------------------------|-----------|-----|----|
|               | <i>Mycteria ibis</i>    | 854       | 100 | 90 |
| N1, N2, N25   | <i>Grus monacha</i>     | 1315-1321 | 100 | 99 |
|               | <i>Grus nigricollis</i> | 1277-1282 | 100 | 99 |
| N17, N23, N24 | <i>Grus nigricollis</i> | 1321-1327 | 100 | 99 |
|               | <i>Grus monacha</i>     | 1271-1277 | 100 | 99 |

(b)

| Sample vouchers | Outputs of online nucleotide BLAST |           |                 |              |
|-----------------|------------------------------------|-----------|-----------------|--------------|
|                 | Classified species                 | Max score | Query cover (%) | Identity (%) |
| S29             | <i>Papio anubis</i>                | 1243      | 100             | 99           |
|                 | <i>Papio hamadryas</i>             | 1238      | 100             | 99           |
| S30, S36        | <i>Cercopithecus mitis</i>         | 1205      | 100             | 98           |
|                 | <i>Cercopithecus</i>               | 1199      | 100             | 98           |
|                 | <i>albogularis</i>                 |           |                 |              |
| S61             | <i>Papio hamadryas</i>             | 1192      | 100             | 99           |
|                 | <i>Papio anubis</i>                | 1186      | 100             | 99           |

\* The samples failing to be identified by online nucleotide BLAST.

Table 5 The individuals deviating from the average genetic divergence level, (a) with very large intraspecific distance, (b) with very low interspecific distance

(a)

| Species (sample No.)            | samples       | Intraspecific K2P distances (%) |       |       |
|---------------------------------|---------------|---------------------------------|-------|-------|
|                                 |               | Min                             | Mean  | Max   |
| <i>Falco columbarius</i> (3)    | KF537263      | 2.05                            | 2.05  | 2.05  |
| <i>Accipiter gentilis</i> (6)   | AY666498      | 2.52                            | 2.57  | 2.69  |
|                                 | DQ433279      |                                 |       |       |
| <i>Accipiter gularis</i> (4)    | JQ173889      | 2.04                            | 2.04  | 2.04  |
| <i>Strix nebulosa</i> (4)       | KF525370      | 3.02                            | 3.02  | 3.02  |
|                                 | DQ434173      |                                 |       |       |
| <i>Ithaginis cruentus</i> (2)   | GQ922649      | 2.37                            | 2.37  | 2.37  |
| <i>Cebus apella</i> (6)         | NC016666      | 31.08                           | 31.45 | 31.69 |
| <i>Saimiri sciureus</i> (7)     | NC012775      | 2.86                            | 2.88  | 3.02  |
| <i>Cercopithecus mitis</i> (4)  | NC023961      | 4.50                            | 4.72  | 4.82  |
| <i>Papio anubis</i> (5)         | JX946197      | 2.88                            | 3.07  | 3.35  |
| <i>Chlorocebus aethiops</i> (4) | NC007009      | 6.83                            | 6.87  | 6.93  |
| <i>Cervus elaphus</i> (5)       | NC014703      | 2.37                            | 2.48  | 2.53  |
|                                 | NC013836      |                                 |       |       |
| <i>Elaphurus davidianus</i> (5) | NC018358      | 13.31                           | 13.36 | 13.49 |
| <i>Muntiacus muntjak</i> (2)    | JN714193      | 3.35                            | 3.35  | 3.35  |
| <i>Panthera leo</i> # (5)       | S14, S15, S18 | 6.38                            | 6.53  | 6.73  |

(b)

| Species A (Sample No.)          | Species B (Sample No.)              | Interspecific K2P pairwise distance (%) |      |      |
|---------------------------------|-------------------------------------|-----------------------------------------|------|------|
|                                 |                                     | Min                                     | Mean | Max  |
| <i>Falco vespertinus</i> (1)    | <i>Falco amurensis</i> (2)          | 1.57                                    | 1.57 | 1.57 |
| <i>Accipiter virgatus</i> (3)   | <i>Accipiter gularis</i> #(4)       | 0                                       | 0.94 | 2.04 |
| <i>Buteo buteo</i> (5)          | <i>Buteo hemilasius</i> #(4)        | 0.31                                    | 0.62 | 1.09 |
| <i>Strix davidi</i> (1)         | <i>Strix uralensis</i> (5)          | 1.09                                    | 1.34 | 1.41 |
| <i>Syrnaticus ellioti</i> (1)   | <i>Syrnaticus humiae</i> (1)        | 0                                       | 0    | 0    |
| <i>Saimiri sciureus</i> #(7)    | <i>Saimiri boliviensis</i> (2)      | 0                                       | 2.47 | 3.02 |
| <i>Papio anubis</i> #(5)        | <i>Papio hamadryas</i> #(3)         | 0.15                                    | 0.90 | 2.86 |
| <i>Chlorocebus sabaues</i> (1)  | <i>Chlorocebus aethiops</i> (4)     | 0                                       | 1.73 | 6.93 |
| <i>Pseudois nayaur</i> #(5)     | <i>Pseudois schaeferi</i> #(5)      | 1.09                                    | 1.56 | 1.73 |
| <i>Capricornis swinhoei</i> (1) | <i>Capricornis sumatraensis</i> (3) | 1.57                                    | 1.62 | 1.73 |
| <i>Cervus unicolor</i> #(5)     | <i>Cervus elaphus</i> (5)           | 1.25                                    | 2.65 | 3.68 |
| <i>Cervus elaphus</i> (5)       | <i>Cervus nippon</i> #(10)          | 1.73                                    | 2.71 | 3.35 |
| <i>Panthera leo</i> #(5)        | <i>Panthera onca</i>                | 2.20                                    | 3.81 | 6.24 |

# Putative species inferred from DNA barcoding identification for queried samples.

Table 6 Diagnostic formulas of the endangered birds and mammals generated by BLOG for species identification

| Scientific name                 | Diagnostic nucleotide formulas                         | Score |
|---------------------------------|--------------------------------------------------------|-------|
| <i>Lophophorus lhuysii</i>      | pos363=T & pos399=G                                    | 0.035 |
| <i>Phasianus colchicus</i>      | pos30=T & pos363=T & pos399=C                          | 0.068 |
| <i>Arborophila rufipectus</i>   | pos207=T & pos528=C                                    | 0.079 |
| <i>Arborophila ardens</i>       | pos528=C & pos627=C                                    | 0.035 |
| <i>Arborophila brunnepectus</i> | pos519=T & pos528=G                                    | 0.025 |
| <i>Falco rusticolus</i>         | pos399=T & pos528=G                                    | 0.057 |
| <i>Falco tinnunculus</i>        | pos399=T & pos528=A & pos627=C                         | 0.068 |
| <i>Buteo hemilasius</i>         | pos66=C & pos84=T & pos627=T<br>OR pos207=C & pos282=G | 0.035 |
| <i>Pandion haliaetus</i>        | pos84=A & pos627=T                                     | 0.057 |
| <i>Asio otus</i>                | pos363=A & pos399=G & pos444=C                         | 0.024 |
| <i>Athene noctus</i>            | pos207=A & pos444=C & pos627=A                         | 0.024 |
| <i>Grus monacha</i>             | pos49=T & pos453=C & pos519=C & pos627=T               | 0.047 |
| <i>Grus vipio</i>               | pos54=T & pos282=T & pos444=A                          | 0.047 |
| <i>Grus nigricollis</i>         | pos282=T & pos453=T                                    | 0.047 |
| <i>Grus leucogeranus</i>        | pos207=T & pos399=G                                    | 0.068 |
| <i>Grus japonensis</i>          | pos49=T & pos627=C                                     | 0.057 |
| <i>Anthropoides virgo</i>       | pos444=G                                               | 0.035 |
| <i>Ciconia ciconia</i>          | pos54=T & pos66=T & pos207=A & pos519=C & pos627=T     | 0.047 |

---

|                                   |                                                                      |       |
|-----------------------------------|----------------------------------------------------------------------|-------|
| <i>Leptoptilos crumenifer</i>     | pos66=C & pos207=T & pos627=T                                        | 0.047 |
| <i>Pseudois nayaur</i>            | pos333=C & pos360=T                                                  | 0.071 |
| <i>Pseudois schaeferi</i>         | pos333=T & pos360=T & pos644=T                                       | 0.071 |
| <i>Pantholops hodgsonii</i>       | pos27=G & pos423=A                                                   | 0.058 |
| <i>Cervus unicolor</i>            | pos207=T & pos264=T & pos418=T                                       | 0.071 |
| <i>Cervus albirostris</i>         | pos78=T & pos192=T & pos210=T                                        | 0.058 |
| <i>Cervus nippon</i>              | pos78=T & pos423=G & pos495=C<br>OR pos192=C & pos225=C & pos423=G   | 0.097 |
| <i>Mandrillus sphinx</i>          | pos27=T & pos495=C                                                   | 0.044 |
| <i>Cercopithecus mitis</i>        | pos78=C & pos117=G OR pos117=G & pos333=T                            | 0.058 |
| <i>Cercopithecus aethiops</i>     | pos264=C & pos644!=T OR pos207=G & pos423=A                          | 0.044 |
| <i>Trachypithecus francoisi</i>   | pos312=A & pos333=A & pos423=G                                       | 0.056 |
| <i>Trachypithecus hatinhensis</i> | Pos312=G & pos333=A & pos418=C                                       | 0.029 |
| <i>Papio anubis</i>               | pos27=T & pos360=A & pos423=G<br>OR pos27=T & pos264=T & pos423=A    | 0.058 |
| <i>Papio hamadryas</i>            | pos27=T & pos192=G & pos423=A                                        | 0.044 |
| <i>Saimiri sciureus</i>           | pos78=G & pos117=C                                                   | 0.069 |
| <i>Cebus apella</i>               | pos78!=C & pos78!=G & pos153!=A & pos264=A &<br>pos495=T & pos644!=A | 0.071 |
| <i>Nycticebus pygmaeus</i>        | pos192=G & pos333=A                                                  | 0.044 |
| <i>Lemur catta</i>                | pos333=T & pos423=C                                                  | 0.044 |
| <i>Panthera pardus</i>            | pos333=A & pos495=C                                                  | 0.058 |
| <i>Panthera leo</i>               | pos117=C & pos210=C & pos423=T                                       | 0.071 |
| <i>Panthera tigris amoyensis</i>  | pos207=G & pos423=T                                                  | 0.071 |
| <i>Ailuropoda melanoleuca</i>     | pos210=G                                                             | 0.071 |

---

Table 7 The conclusion of DNA barcoding identifications of (a) birds, (b) mammals, combined with morphological classification. Grey shadowed lines indicated samples with inconsistent morphological and molecular identification. Underlined samples indicated those just classified to generic level based on DNA barcoding

(a)

| Sample vouchers      | Online BLAST                                        |              | Online BOLD                                    |                     |                                      | NJ tree                   | DNA barcoding identification         | Morphological identification         |
|----------------------|-----------------------------------------------------|--------------|------------------------------------------------|---------------------|--------------------------------------|---------------------------|--------------------------------------|--------------------------------------|
|                      | Species                                             | Identity (%) | Species                                        | Similarity (%)      | Distance                             |                           |                                      |                                      |
| N1, N2, N25          | <i>Grus monacha</i>                                 | 99           | <i>Grus (Grus monacha)</i>                     | 100 (99.86)         | <i>Grus monacha</i>                  | <i>Grus monacha</i>       | <i>Grus monacha</i>                  | <i>Grus monacha</i>                  |
| N15, N16             | <i>Grus vipio</i>                                   | 100          | <i>Grus vipio</i>                              | 100                 | <i>Grus vipio</i>                    | <i>Grus vipio</i>         | <i>Grus vipio</i>                    | <i>Grus vipio</i>                    |
| N17, N23, N24        | <i>Grus nigricollis</i>                             | 99           | <i>Grus (Grus nigricollis)</i>                 | 100 (99.86)         | <i>Grus nigricollis</i>              | <i>Grus nigricollis</i>   | <i>Grus nigricollis</i>              | <i>Grus nigricollis</i>              |
| N18, N19, N29, N30   | <i>Grus leucogeranus</i>                            | 99           | <i>Grus leucogeranus</i>                       | 99.40~99.58         | <i>Grus leucogeranus</i>             | <i>Grus leucogeranus</i>  | <i>Grus leucogeranus</i>             | <i>Grus leucogeranus</i>             |
| N20-N22, N33, N34    | <i>Grus japonensis</i>                              | 99           | <i>Grus japonensis</i>                         | 99.70~100           | <i>Grus japonensis</i>               | <i>Grus japonensis</i>    | <i>Grus japonensis</i>               | <i>Grus japonensis</i>               |
| N27, N28             | <i>Anthropoides virgo</i>                           | 100          | <i>Anthropoides virgo</i>                      | 100                 | <i>Anthropoides virgo</i>            | <i>Anthropoides virgo</i> | <i>Anthropoides virgo</i>            | <i>Anthropoides virgo</i>            |
| N7†, N8†, N31†, N32† | <i>Ciconia boyciana</i>                             | 100          | <i>Ciconia boyciana</i>                        | 100                 | <i>Ciconia boyciana</i>              | <i>Ciconia boyciana</i>   | <i>Ciconia boyciana</i>              | <i>Ciconia ciconia</i>               |
| <u>N9*-N11*</u>      | <u><i>Ciconia maguari</i></u>                       | 91           | <u><i>Leptoptilos crumenifer</i></u>           | 99.80               | <u><i>Leptoptilos crumenifer</i></u> | Ciconiidae                | <u><i>Leptoptilos crumenifer</i></u> | <u><i>Leptoptilos crumenifer</i></u> |
| <u>N12*-N14*</u>     | <u><i>Mycteria leucocephala</i></u>                 | 97           | <u><i>Mycteria (Mycteria leucocephala)</i></u> | 97.80~98.00 (98.00) | <u><i>Mycteria leucocephala</i></u>  | <i>Mycteria sp.</i>       | <i>Mycteria sp.</i>                  | <i>Mycteria ibis</i>                 |
| B02                  | <i>Pandion haliaetus</i>                            | 97           | <i>Pandion haliaetus</i>                       | 100                 | <i>Pandion haliaetus</i>             | <i>Pandion haliaetus</i>  | <i>Pandion haliaetus</i>             | <i>Pandion haliaetus</i>             |
| <u>B03*</u>          | <u><i>Accipiter gularis/ Accipiter virgatus</i></u> | 100          | <u><i>Accipiter (Accipiter gularis)</i></u>    | 100 (100)           | <u><i>Accipiter sp.</i></u>          | <i>Accipiter sp.</i>      | <i>Accipiter sp.</i>                 | <i>Accipiter virgatus</i>            |
| B05*†                | <i>Falco rusticolus</i>                             | 100          | <u><i>Falco (Falco biarmicus)</i></u>          | 100 (100)           | <i>Falco rusticolus</i>              | <i>Falco rusticolus</i>   | <i>Falco rusticolus</i>              | <i>Falco cherrug</i>                 |
| B08*                 | <i>Asio otus</i>                                    | 99           | <i>Asio (Asio otus)</i>                        | 100 (100)           | <i>Asio otus</i>                     | Strigidae                 | <i>Asio otus</i>                     | <i>Asio otus</i>                     |
| B13                  | <i>Falco tinnunculus</i>                            | 99           | <i>Falco</i>                                   | 100 (100)           | <i>Falco tinnunculus</i>             | <i>Falco tinnunculus</i>  | <i>Falco tinnunculus</i>             | <i>Falco tinnunculus</i>             |

|                                |                                  |     |                                                      |           |                                  |                                  |                                  |                                  |
|--------------------------------|----------------------------------|-----|------------------------------------------------------|-----------|----------------------------------|----------------------------------|----------------------------------|----------------------------------|
| B15*                           | <i>Athene noctua</i>             | 100 | ( <i>Falco tinnunculus</i> )<br><i>Athene noctua</i> | 100       | <i>Athene noctua</i>             | Strigidae                        | <i>Athene noctua</i>             | <i>Athene noctua</i>             |
| B16††                          | <i>Buteo hemilasius</i>          | 99  | <i>Buteo</i><br>( <i>Buteo hemilasius</i> )          | 100 (100) | <i>Buteo hemilasius</i>          | <i>Buteo hemilasius</i>          | <i>Buteo hemilasius</i>          | <i>Aquila clanga</i>             |
| B04                            | <i>Lophophorus lhuysii</i>       | 99  | <i>Lophophorus lhuysii</i>                           | 99.16     | <i>Lophophorus lhuysii</i>       | <i>Lophophorus lhuysii</i>       | <i>Lophophorus lhuysii</i>       | <i>Lophophorus lhuysii</i>       |
| B12, B35                       | <i>Phasianus colchicus</i>       | 99  | <i>Phasianus colchicus</i>                           | 99.90     | <i>Phasianus colchicus</i>       | <i>Phasianus colchicus</i>       | <i>Phasianus colchicus</i>       | <i>Phasianus colchicus</i>       |
| AR1-AR3,<br>AR5, ARB3,<br>ARB6 | <i>Arborophila rufipectus</i>    | 100 | <i>Arborophila rufipectus</i>                        | 99.00~100 | <i>Arborophila rufipectus</i>    | <i>Arborophila rufipectus</i>    | <i>Arborophila rufipectus</i>    | <i>Arborophila rufipectus</i>    |
| B10*                           | <i>Arborophila ardens</i>        | 99  | No match                                             | -         | <i>Arborophila ardens</i>        | <i>Arborophila ardens</i>        | <i>Arborophila ardens</i>        | <i>Arborophila ardens</i>        |
| B33*                           | <i>Arborophila brunneopectus</i> | 99  | No match                                             | -         | <i>Arborophila brunneopectus</i> | <i>Arborophila brunneopectus</i> | <i>Arborophila brunneopectus</i> | <i>Arborophila brunneopectus</i> |

(b)

| Sample vouchers | Online BLAST                |              | Online BOLD                                      |                | Distance                    | NJ tree                     | DNA barcoding identification | Morphological identification |
|-----------------|-----------------------------|--------------|--------------------------------------------------|----------------|-----------------------------|-----------------------------|------------------------------|------------------------------|
|                 | Species                     | Identity (%) | Species (best match)                             | Similarity (%) |                             |                             |                              |                              |
| A11             | <i>Pseudois nayaur</i>      | 99           | <i>Pseudois</i><br>( <i>Pseudois nayaur</i> )    | 100 (100)      | <i>Pseudois nayaur</i>      | <i>Pseudois nayaur</i>      | <i>Pseudois nayaur</i>       | <i>Pseudois nayaur</i>       |
| A17             | <i>Pseudois schaeferi</i>   | 100          | <i>Pseudois</i><br>( <i>Pseudois schaeferi</i> ) | 100 (100)      | <i>Pseudois schaeferi</i>   | <i>Pseudois schaeferi</i>   | <i>Pseudois schaeferi</i>    | <i>Pseudois schaeferi</i>    |
| A53             | <i>Pantholops hodgsonii</i> | 100          | <i>Pantholops hodgsonii</i>                      | 100            | <i>Pantholops hodgsonii</i> | <i>Pantholops hodgsonii</i> | <i>Pantholops hodgsonii</i>  | <i>Pantholops hodgsonii</i>  |
| A23             | <i>Cervus unicolor</i>      | 99           | <i>Cervus</i> ( <i>Cervus unicolor</i> )         | 100 (99.69)    | <i>Cervus unicolor</i>      | <i>Cervus unicolor</i>      | <i>Cervus unicolor</i>       | <i>Cervus unicolor</i>       |
| A29             | <i>Cervus albirostris</i>   | 99           | <i>Cervus</i><br>( <i>Cervus albirostris</i> )   | 100 (100)      | <i>Cervus albirostris</i>   | <i>Cervus albirostris</i>   | <i>Cervus albirostris</i>    | <i>Cervus albirostris</i>    |
| M1, Q2,<br>H26  | <i>Cervus nippon</i>        | 99           | <i>Cervus</i> ( <i>Cervus nippon</i> )           | 100 (100)      | <i>Cervus nippon</i>        | <i>Cervus nippon</i>        | <i>Cervus nippon</i>         | <i>Cervus nippon</i>         |
| S38, S62        | <i>Mandrillus sphinx</i>    | 100          | <i>Mandrillus sphinx</i>                         | 100            | <i>Mandrillus sphinx</i>    | <i>Mandrillus sphinx</i>    | <i>Mandrillus sphinx</i>     | <i>Mandrillus sphinx</i>     |
| S30, S36        | <i>Cercopithecus mitis</i>  | 98           | <i>Cercopithecus</i>                             | 97.70 97.66    | <i>Cercopithecus mitis</i>  | <i>Cercopithecus sp.</i>    | <i>Cercopithecus mitis</i>   | <i>Cercopithecus mitis</i>   |

| ( <i>Cercopithecus mitis</i> ) |                                   |     |                                                                |                      |                                   |                                   |                                   |                                  |
|--------------------------------|-----------------------------------|-----|----------------------------------------------------------------|----------------------|-----------------------------------|-----------------------------------|-----------------------------------|----------------------------------|
| S64*                           | <i>Chlorocebus aethiops</i>       | 98  | <i>Cercopithecus aethiops</i>                                  | 98.42                | <i>Chlorocebus aethiops</i>       | <i>Chlorocebus sp.</i>            | <i>Chlorocebus aethiops</i>       | <i>Chlorocebus aethiops</i>      |
| S44                            | <i>Trachypithecus francoisi</i>   | 97  | <i>Trachypithecus francoisi</i>                                | 99.32                | <i>Trachypithecus francoisi</i>   | <i>Trachypithecus francoisi</i>   | <i>Trachypithecus francoisi</i>   | <i>Trachypithecus francoisi</i>  |
| S63†                           | <i>Trachypithecus hatinhensis</i> | 99  | <i>Trachypithecus hatinhensis</i>                              | 100                  | <i>Trachypithecus hatinhensis</i> | <i>Trachypithecus hatinhensis</i> | <i>Trachypithecus hatinhensis</i> | <i>Trachypithecus francoisi</i>  |
| S29*                           | <i>Papio anubis</i>               | 99  | <i>Papio</i><br>( <i>Papio hamadryas</i> )                     | 100 (99.83)          | <i>Papio anubis</i>               | <i>Papio sp.</i>                  | <i>Papio anubis</i>               | <i>Papio sp.</i>                 |
| S61*                           | <i>Papio hamadryas</i>            | 99  | <i>Papio</i><br>( <i>Papio hamadryas</i> )                     | 100 (99.84)          | <i>Papio hamadryas</i>            | <i>Papio sp.</i>                  | <i>Papio hamadryas</i>            | <i>Papio sp.</i>                 |
| S45, S50                       | <i>Saimiri sciureus</i>           | 100 | <i>Saimiri sciureus</i>                                        | 99                   | <i>Saimiri sciureus</i>           | <i>Saimiri sciureus</i>           | <i>Saimiri sciureus</i>           | <i>Saimiri sciureus</i>          |
| S51††                          | <i>Saimiri sciureus</i>           | 100 | <i>Saimiri sciureus</i>                                        | 99                   | <i>Saimiri sciureus</i>           | <i>Saimiri sciureus</i>           | <i>Saimiri sciureus</i>           | <i>Cuon alpinus</i>              |
| S46                            | <i>Cebus apella</i>               | 100 | <i>Cebus apella</i>                                            | 100                  | <i>Cebus apella</i>               | <i>Cebus apella</i>               | <i>Cebus apella</i>               | <i>Cebus apella</i>              |
| S49*†                          | <i>Nycticebus pygmaeus</i>        | 99  | No match                                                       | -                    | <i>Nycticebus pygmaeus</i>        | <i>Nycticebus pygmaeus</i>        | <i>Nycticebus pygmaeus</i>        | <i>Nycticebus coucang</i>        |
| S26                            | <i>Lemur catta</i>                | 99  | <i>Lemur catta</i>                                             | 100                  | <i>Lemur catta</i>                | <i>Lemur catta</i>                | <i>Lemur catta</i>                | <i>Lemur catta</i>               |
| S23, S28                       | <i>Panthera pardus</i>            | 100 | <i>Panthera pardus</i>                                         | 100                  | <i>Panthera pardus</i>            | <i>Panthera pardus</i>            | <i>Panthera pardus</i>            | <i>Panthera pardus</i>           |
| S14*, S15*, S18*               | <i>Panthera leo</i>               | 99  | <i>Panthera</i> ( <i>Panthera leo</i> )                        | 100<br>(99.26~99.46) | <i>Panthera sp.</i>               | Felidae                           | <i>Panthera leo</i>               | <i>Panthera leo</i>              |
| S53-S59                        | <i>Panthera tigris amoyensis</i>  | 99  | <i>Panthera tigris</i><br>( <i>Panthera tigris amoyensis</i> ) | 100<br>(99.41~99.71) | <i>Panthera tigris amoyensis</i>  | <i>Panthera tigris amoyensis</i>  | <i>Panthera tigris amoyensis</i>  | <i>Panthera tigris amoyensis</i> |
| A3, A4, A144, XJ               | <i>Ailuropoda melanoleuca</i>     | 100 | <i>Ailuropoda melanoleuca</i>                                  | 100                  | <i>Ailuropoda melanoleuca</i>     | <i>Ailuropoda melanoleuca</i>     | <i>Ailuropoda melanoleuca</i>     | <i>Ailuropoda melanoleuca</i>    |

\* showed the samples that obtained species assignments by concluding the results from multiple methods.

† showed potential morphologically-misidentified samples.

†† showed mislabelled samples.



(a)

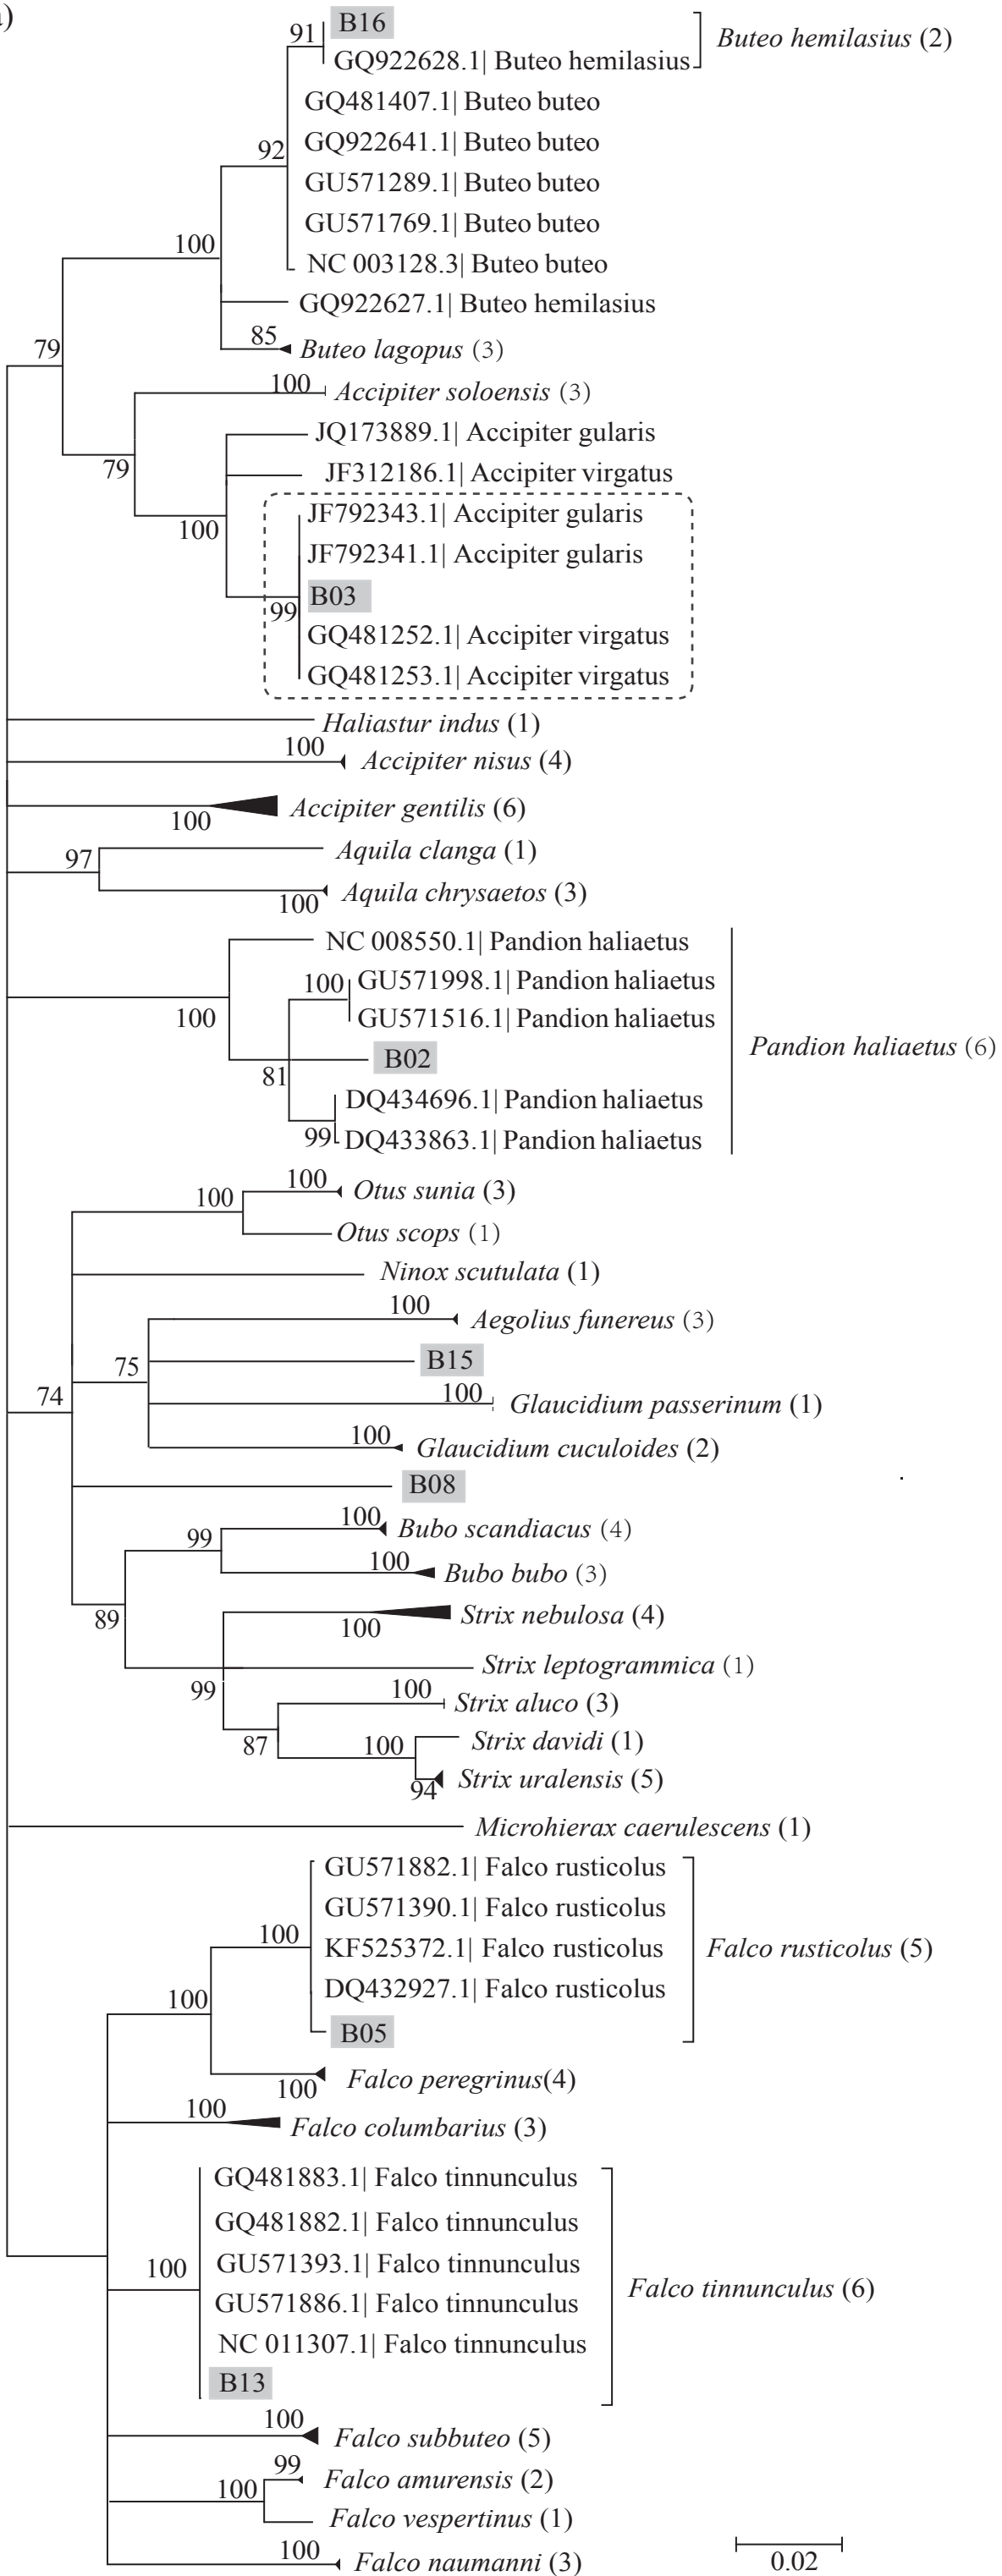

0.02

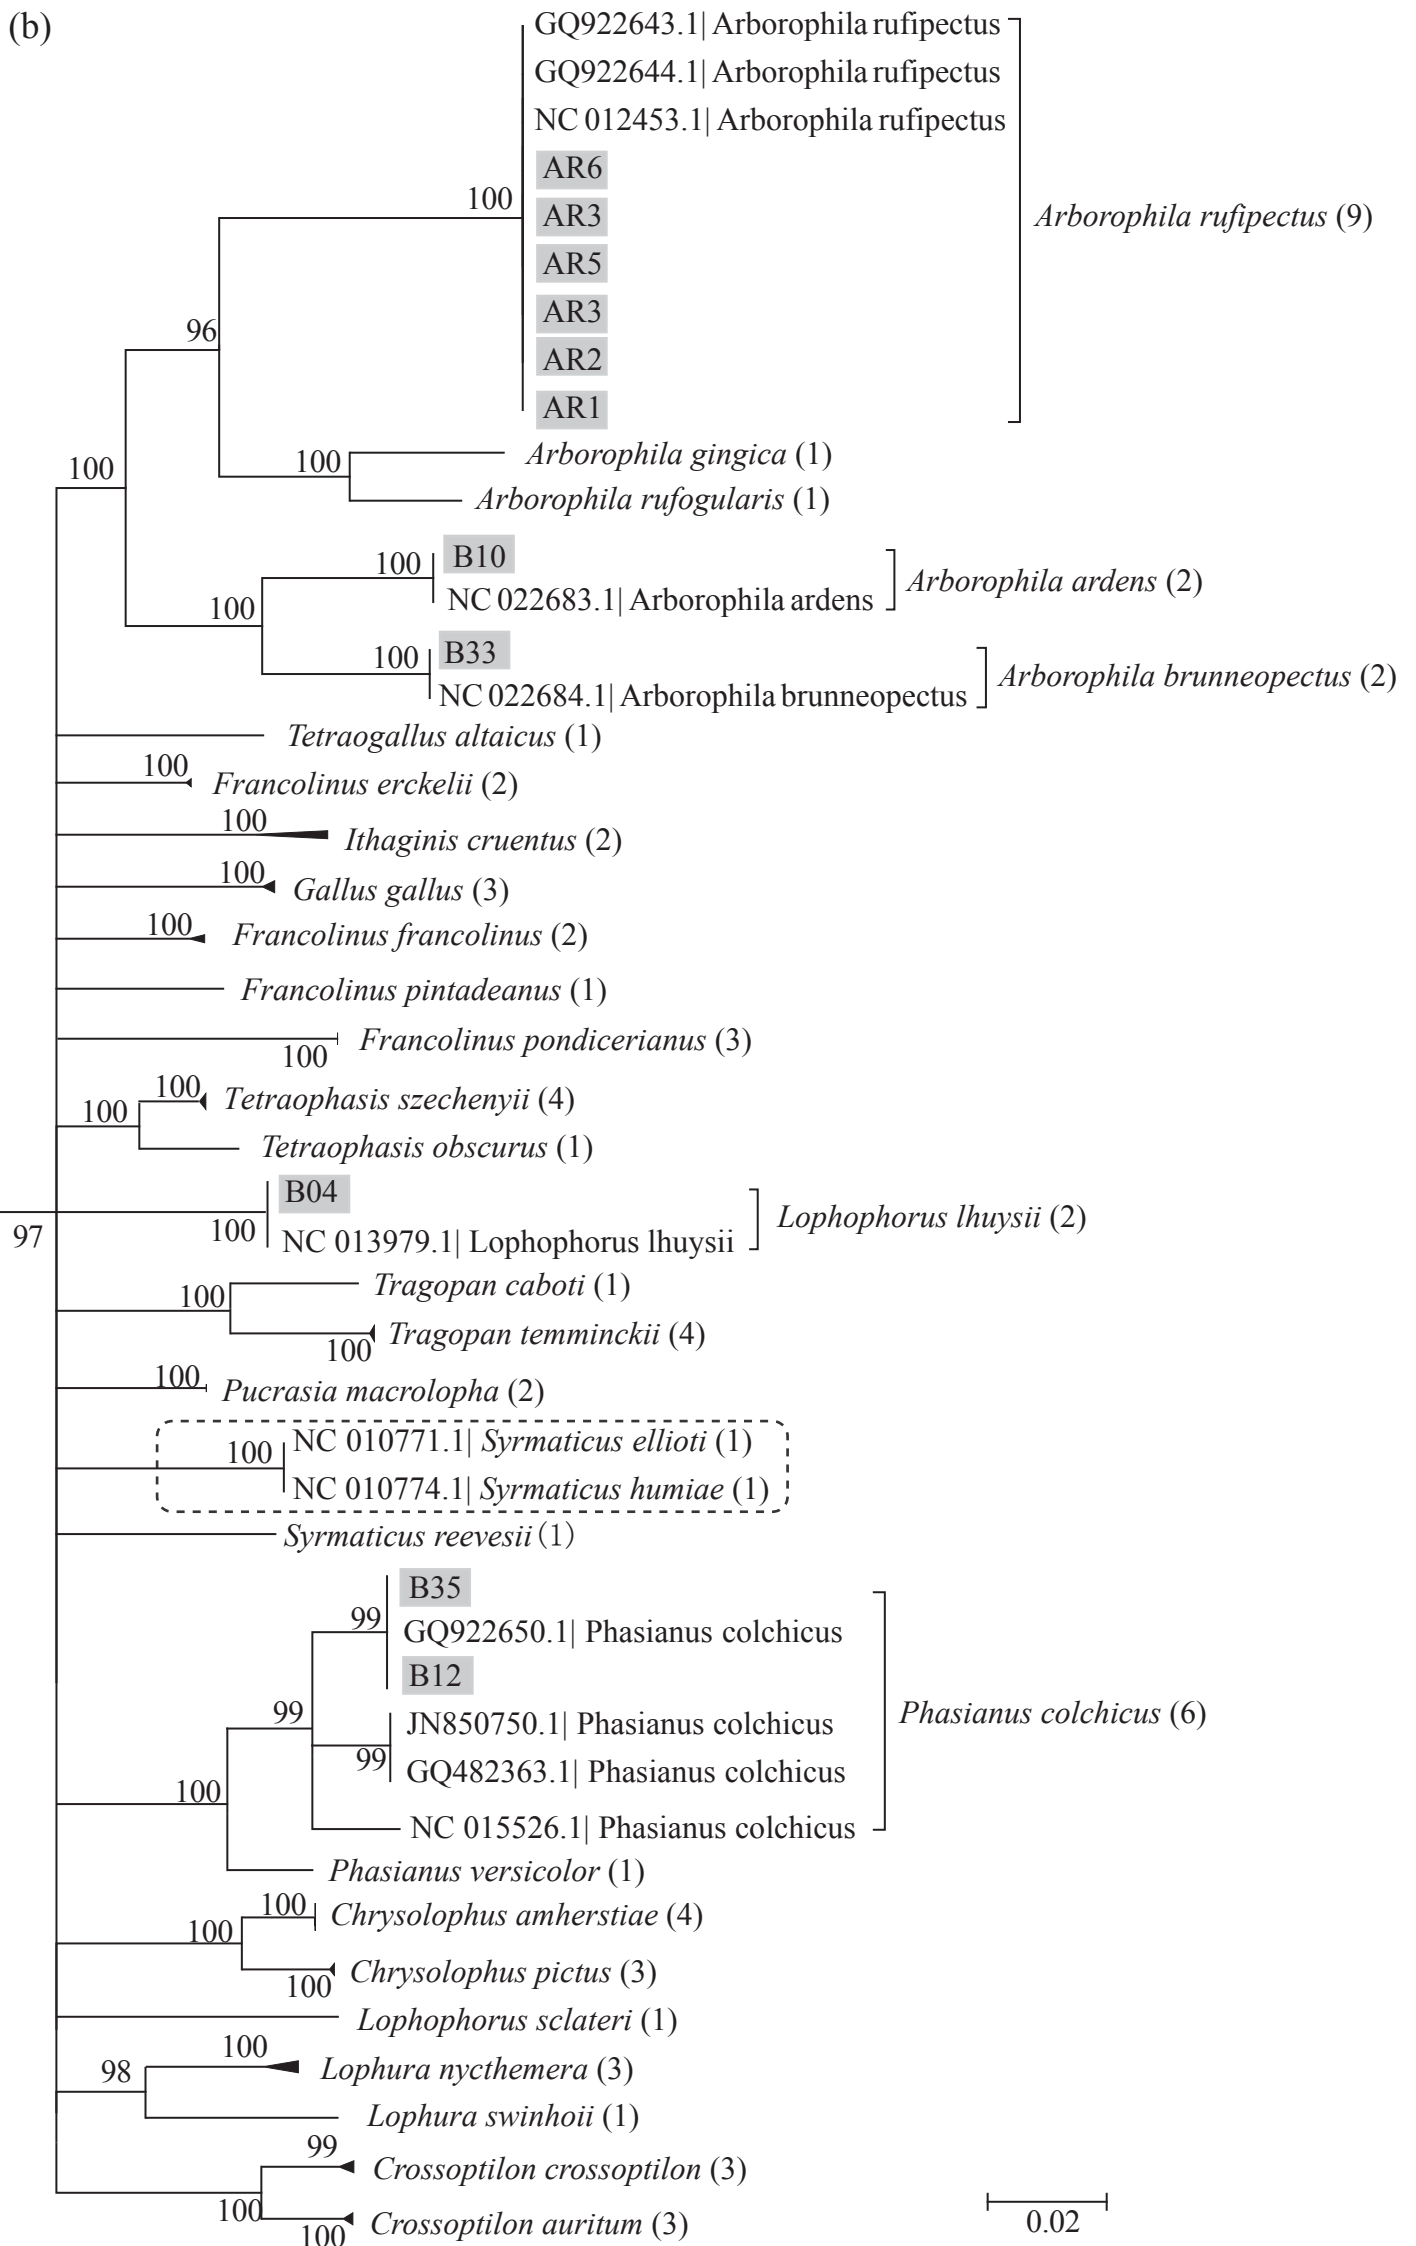

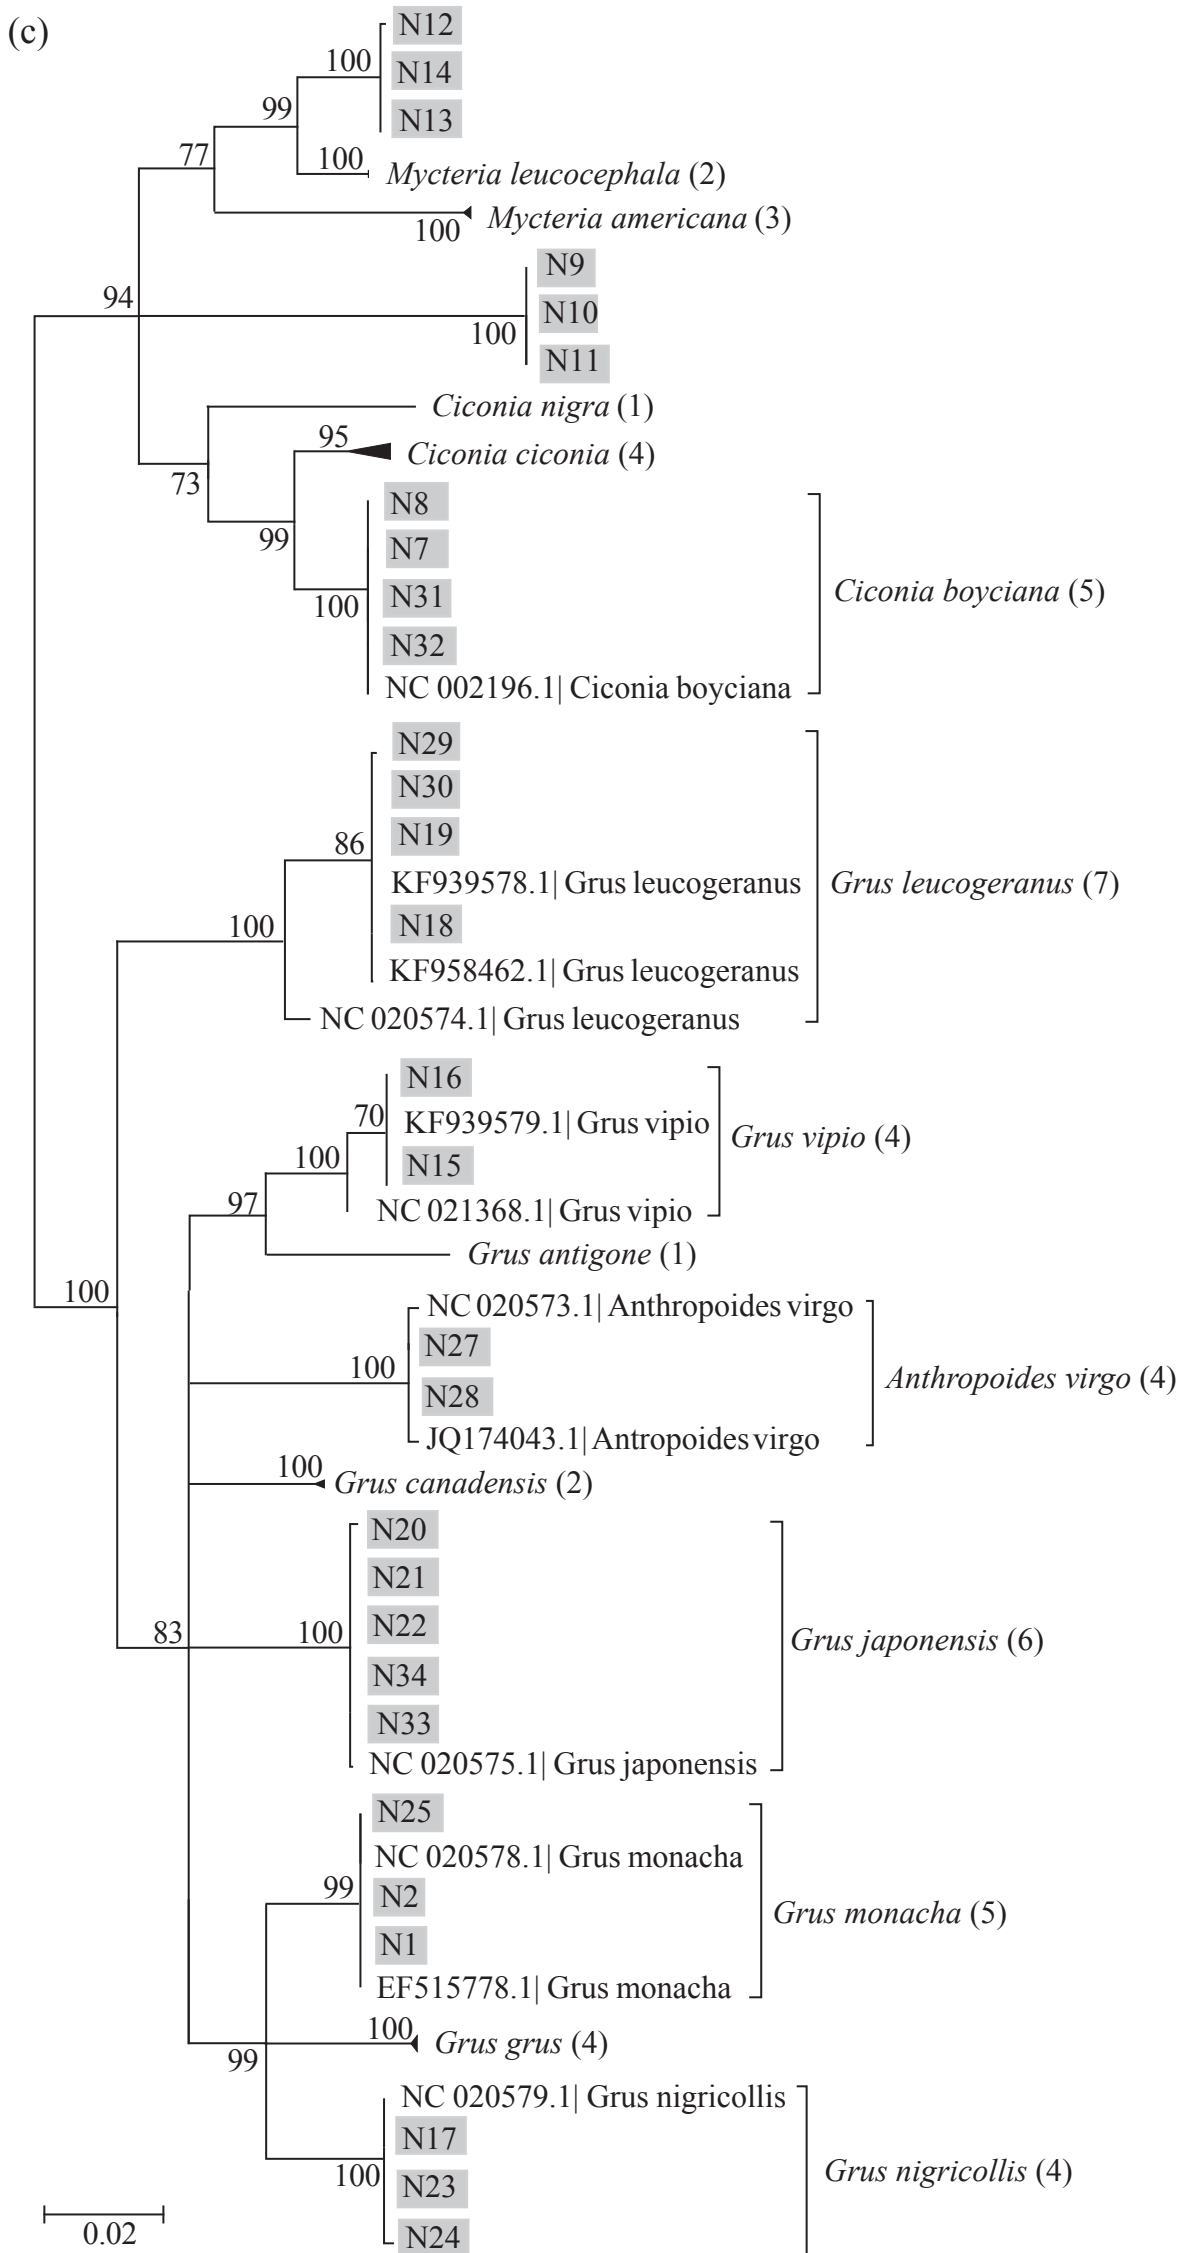

Fig. 1 The Neighbour Joining tree based on the DNA barcodes of endangered birds, (a) raptor, (b) pheasant, (c) crane and stork. Our samples are showed in grey shadow. Numbers refer to nodal support values inferred from NJ bootstrap  $\geq 70\%$ . The samples which shared DNA barcode with hetero-specific individuals are shown in the dashed boxes

(a)

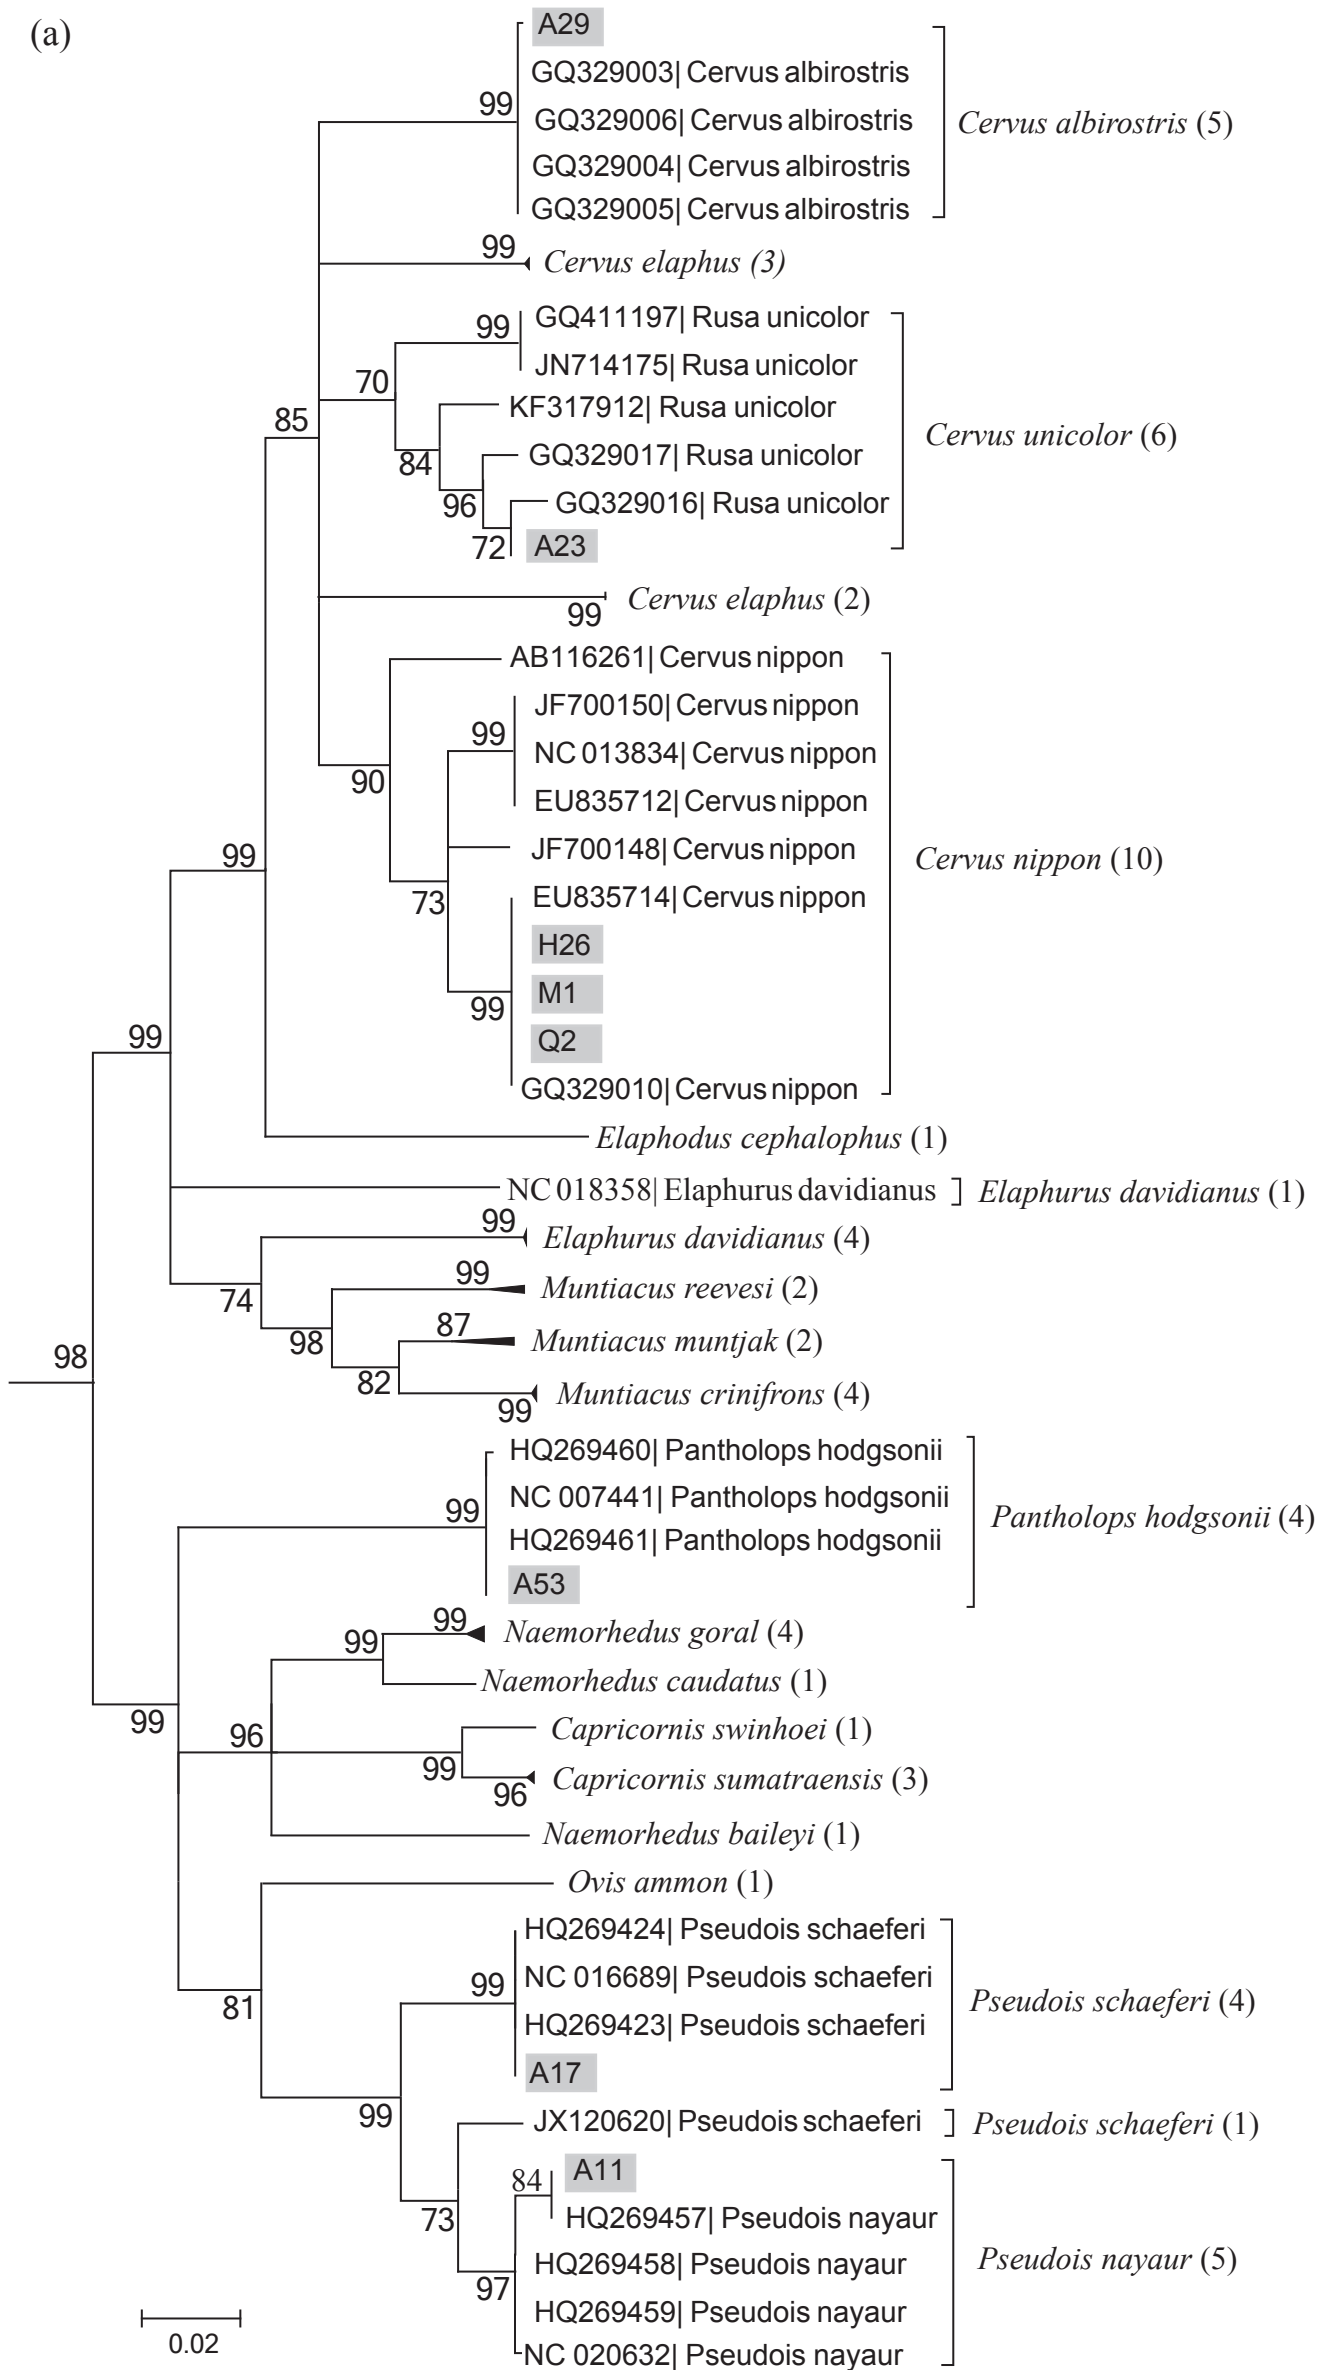

(b)

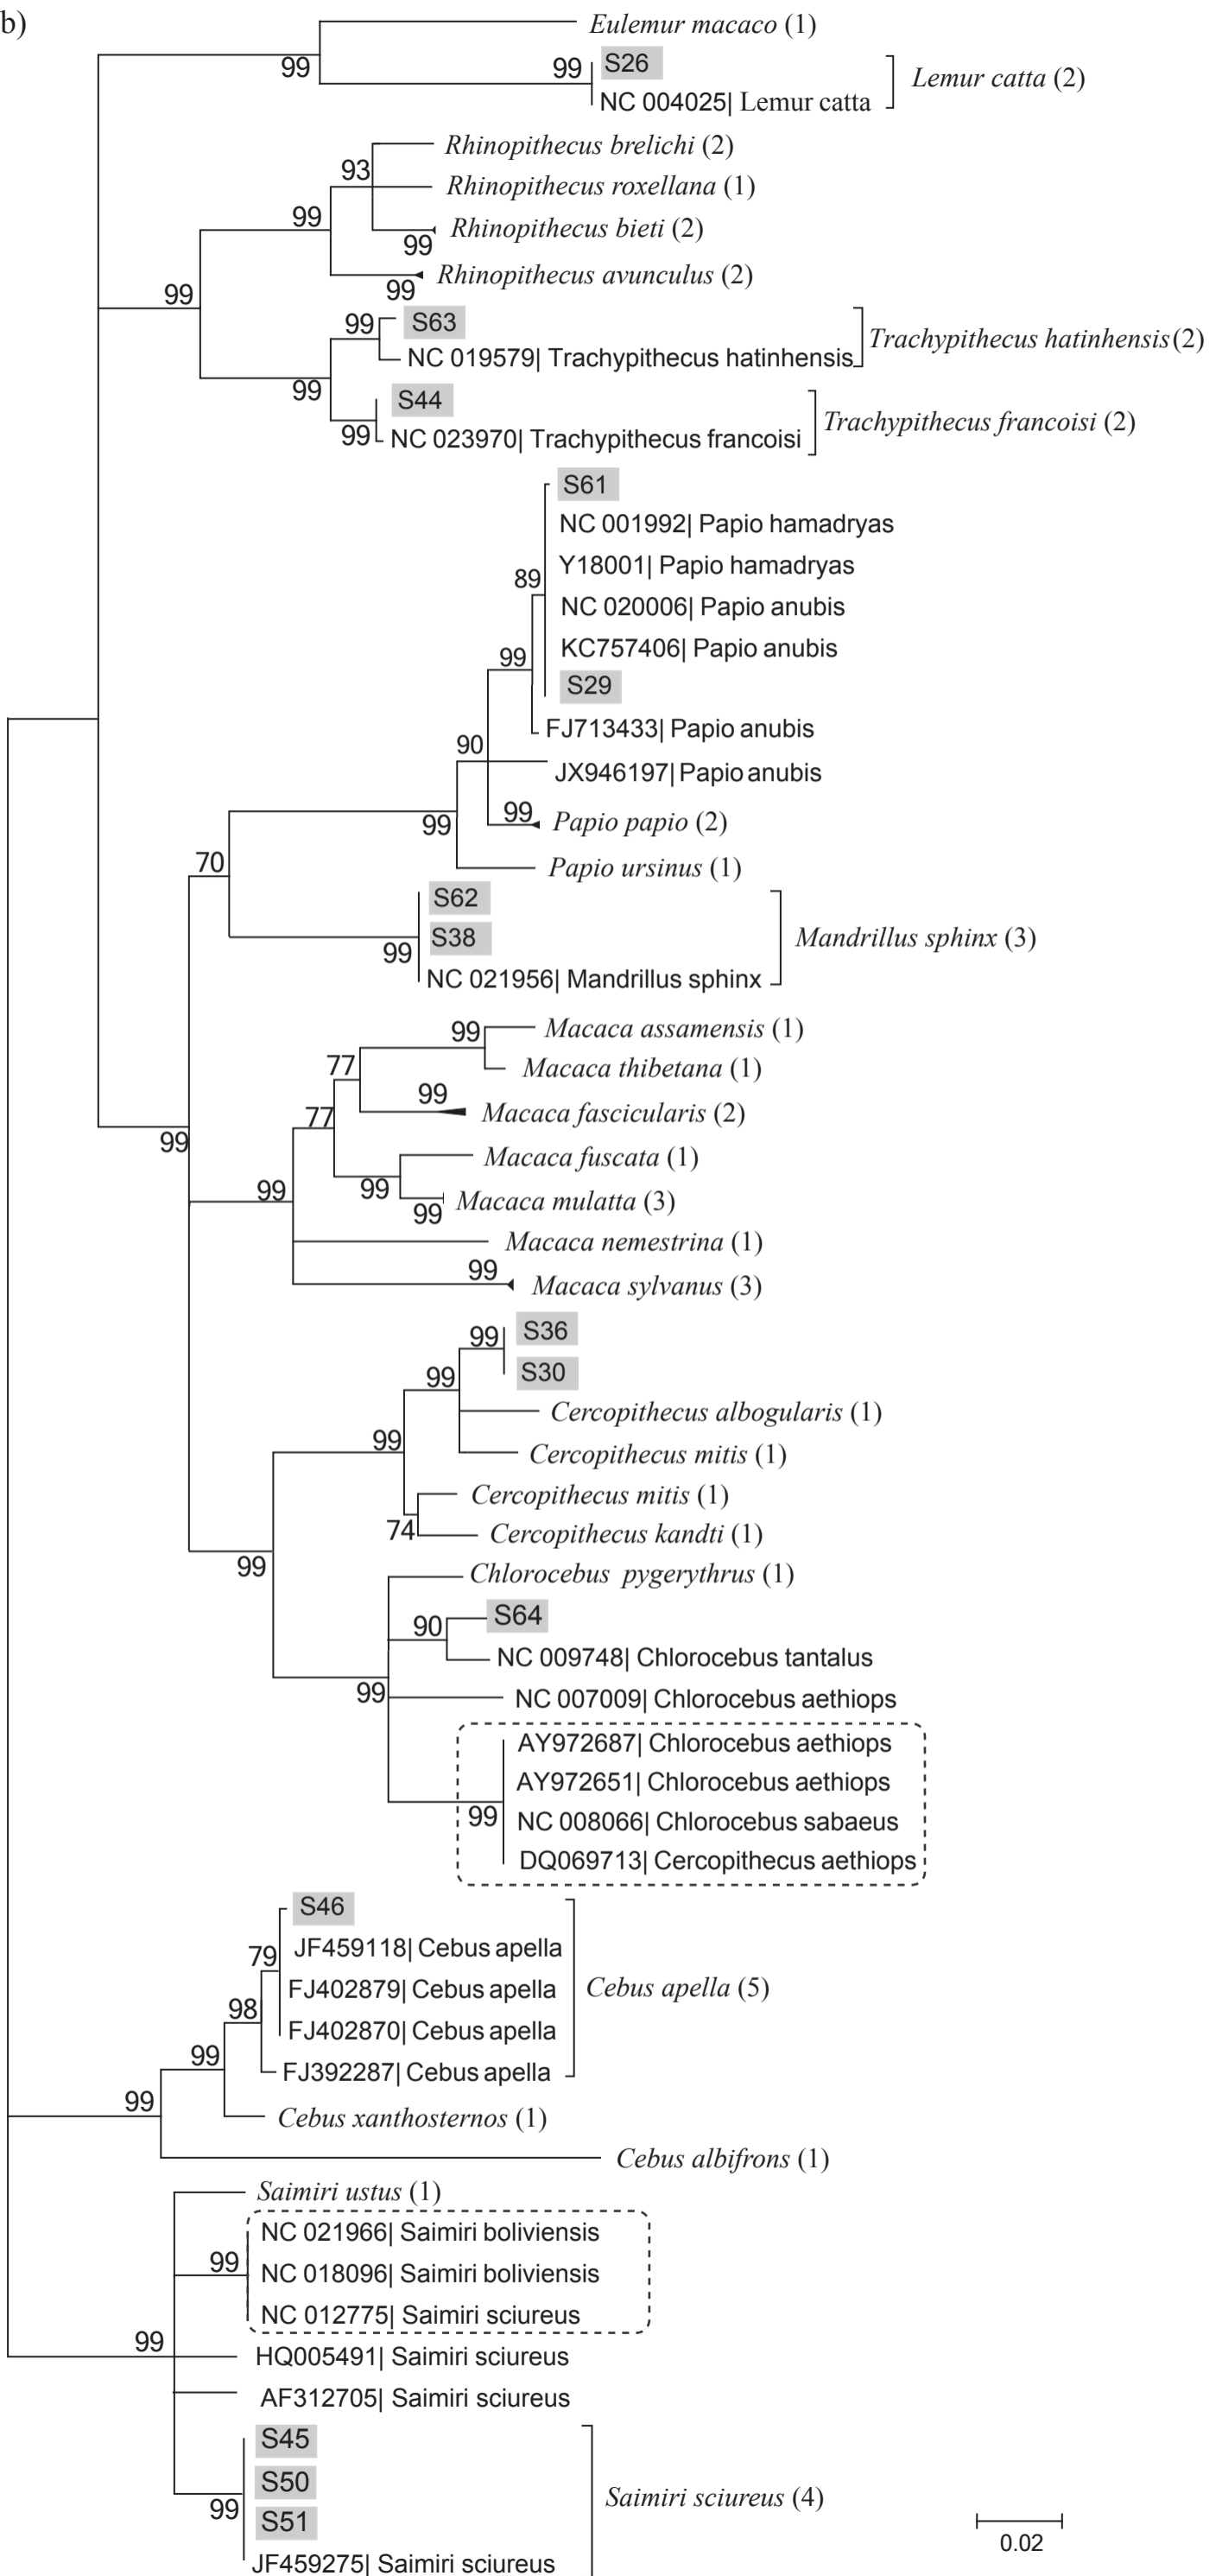

(c)

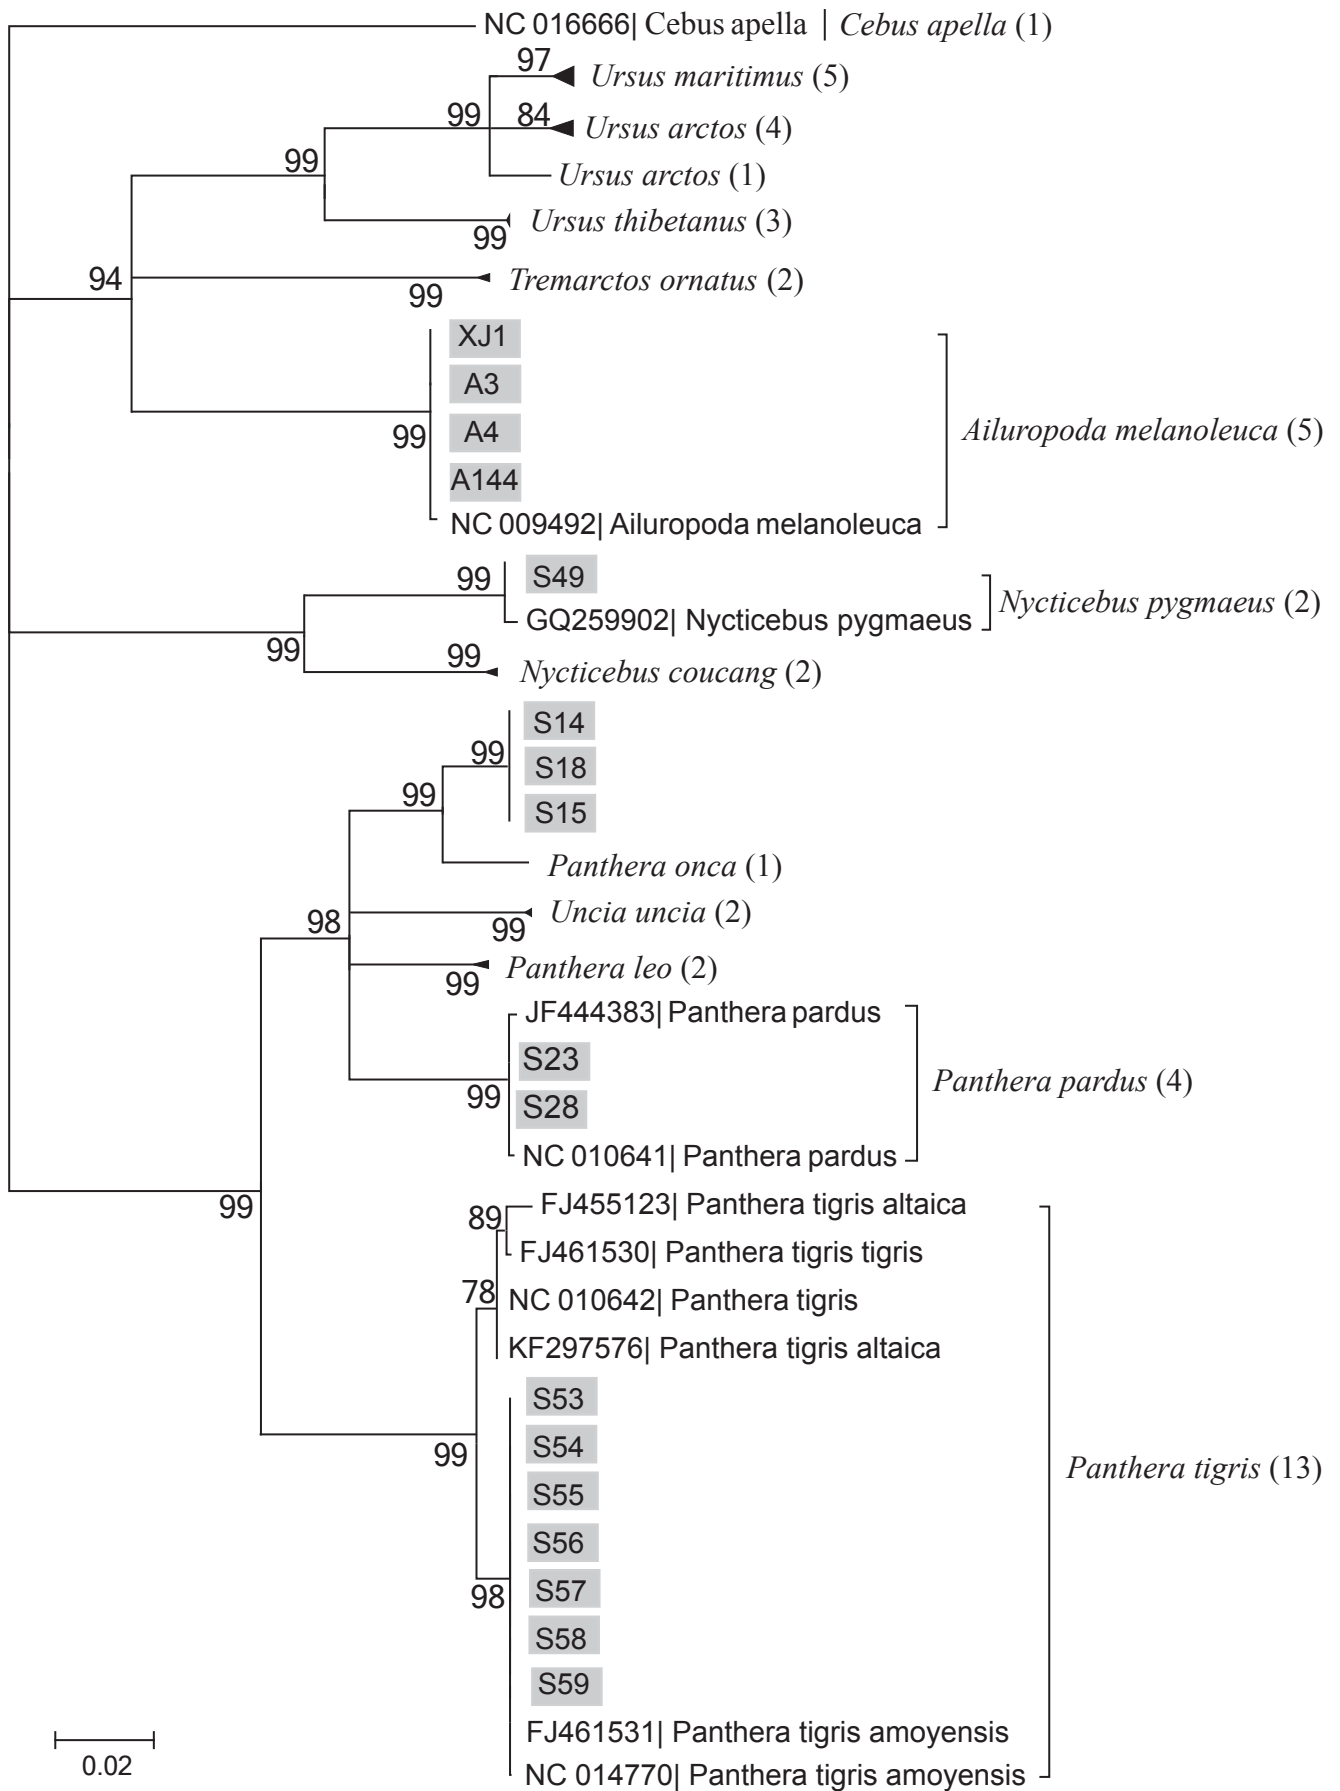

Fig. 2 The Neighbour Joining tree based on the DNA barcodes of endangered mammals, (a) deer and sheep, (b) Old World monkey, (c) carnivore. Our samples are showed in grey shadow. Numbers refer to nodal support values inferred from NJ bootstrap  $\geq 70\%$ . The samples which shared DNA barcode with hetero-specific individuals are inferred in the dashed boxes
